# Supplementary material for: Upgrading 1-butanol to unsaturated, carbonyl and aromatic compounds: a new synthesis approach to produce important organic building blocks
Source: Royal Society of Chemistry journal article supplement (doi:10.1039/d0gc00254b), 2020-01-01
Supplement: d0gc00254b1.pdf [file d0gc00254b1.pdf]

## Electronic Supporting Information (ESI)

### Upgrading 1-butanol to unsaturated, carbonyl and aromatic compounds: a new synthesis approach to produce important organic building blocks.

Jorge Mora Vargas,<sup>a</sup> Luiz Henrique Tofaneli Morelato,<sup>a</sup> Julieth Orduna Ortega,<sup>a,b</sup> Mauricio Boscolo,<sup>a</sup> and Gustavo Metzker<sup>a\*</sup>

<sup>a</sup> *Sao Paulo State University (UNESP), Chemistry and Environmental Sciences Department (IBILCE), São José do Rio Preto, SP, Brazil.*

<sup>b</sup> *Universidad Santiago de Cali, Facultad de Ciencias Básicas, Campus Pampalinda, Santiago de Cali, Colombia.*

\* e-mail: [g.metzker@unesp.br](mailto:g.metzker@unesp.br); Tel.: +55 17 3221-2477.

#### Table of Contents

---

|            |                                                                                       |          |
|------------|---------------------------------------------------------------------------------------|----------|
| <b>1.</b>  | Experimental Section                                                                  | ESI - 2  |
| <b>1.1</b> | Reagents                                                                              | ESI - 2  |
| <b>1.2</b> | Synthesis of hydrotalcites (LDHs) and mixed metal oxides (MMOs)                       | ESI - 2  |
| <b>1.3</b> | Physicochemical characterization of hydrotalcites (LDH) and mixed metal oxides (MMO). | ESI - 2  |
|            | <b>1.3.1</b> - LDH and MMO characterization data                                      | ESI - 3  |
| <b>1.4</b> | Catalytic reactions                                                                   | ESI - 9  |
| <b>2.</b>  | Products distribution by time                                                         | ESI - 11 |
| <b>3.</b>  | Catalyst characterization after reaction                                              | ESI - 15 |
| <b>4.</b>  | Reaction products                                                                     | ESI - 16 |
|            | <b>4.1</b> - GC-MS total ion chromatograms (TIC)                                      | ESI - 16 |
|            | <b>4.2</b> - Retention times for GC-MS total ion chromatograms                        | ESI - 29 |
|            | <b>4.3</b> - Tables                                                                   | ESI - 30 |
| <b>5.</b>  | References                                                                            | ESI - 34 |

---

## 1. Experimental Section

### 1.1 Reagents

$\text{Al}(\text{NO}_3)_3 \cdot 9\text{H}_2\text{O}$  ( $\geq 98\%$ ),  $\text{Cu}(\text{NO}_3)_2 \cdot 3\text{H}_2\text{O}$  (99 %) and  $\text{Mg}(\text{NO}_3)_2 \cdot 6\text{H}_2\text{O}$ , silica gel (particle size 70-230 mesh),  $\text{Na}_2\text{CO}_3$  (99.5 %), 1-butanol (99.4 %) and methanol (99.8 %) were purchased from Sigma Aldrich and used without further purification.

### 1.2 Synthesis of hydrotalcites (LDHs) and mixed metal oxides (MMOs)

The hydrotalcite-like compound modified with  $\text{Cu}^{2+}$  ions ( $\text{Cu}_{20}\text{LDH}$ , catalytic precursor) was synthesized by co-precipitation method using a 3:1 molar ratio (sum of divalent cations  $\text{Mg}^{2+}$  and  $\text{Cu}^{2+} = 3$  and trivalent cation  $\text{Al}^{3+} = 1$ ) as described before in the literature.<sup>1-3</sup> A solution containing  $\text{Mg}(\text{NO}_3)_2 \cdot 6\text{H}_2\text{O}$  ( $0.36 \text{ mol L}^{-1}$ ),  $\text{Al}(\text{NO}_3)_3 \cdot 9\text{H}_2\text{O}$  ( $0.15 \text{ mol L}^{-1}$ ) and  $\text{Cu}(\text{NO}_3)_2 \cdot 3\text{H}_2\text{O}$  ( $0.09 \text{ mol L}^{-1}$ ) was prepared and added slowly in the sodium carbonate solution ( $0.16 \text{ mol L}^{-1}$ ) controlling the pH to 10 using a NaOH solution ( $4 \text{ mol L}^{-1}$ ), temperature ( $60\text{ }^\circ\text{C}$ ) and constant stirring. The resulting solution was aged for 12 h at  $60\text{ }^\circ\text{C}$ . Posteriorly, the solid obtained was washed with deionized water until pH 7, filtered and dried at  $100\text{ }^\circ\text{C}$  for 24 h. The same procedure was employed for obtention of the reference hydrotalcite (without  $\text{Mg}^{2+}$  substitution by  $\text{Cu}^{2+}$ ) employed standard material. For the obtention of mixed metal oxides (MMO) hydrotalcites were calcined at  $450\text{ }^\circ\text{C}$  for 5h giving rise to  $\text{Cu}_{20}\text{MMO}$  and MMO (reference material).

### 1.3 Physicochemical characterization of hydrotalcites (LDH) and mixed metal oxides (MMO).

Powder X-ray diffraction (XRD) patterns of LDHs and MMOs were obtained using a Rigaku model MiniFlex300 diffractometer using  $\text{CuK}\alpha$  radiation ( $\lambda = 1.54 \text{ \AA}$ ) operating at 40 kV and 30 mA at  $2\theta$  in the range of 5 to 70 degrees.

FTIR spectroscopy for LDHs was carried out using an ATR-FTIR Spectrum Two (PerkinElmer) spectrophotometer with an interval of  $400\text{-}4000 \text{ cm}^{-1}$ . Sample powder

was directly placed ATR crystal. FTIR spectra of the MMOs were not obtained due to the low wavenumber of metal oxides bands.

Thermal analysis (TGA) was carried out using a Perkin Elmer TGA 4000 thermogravimetric balance. The mass loss was measured from 100 °C to 500°C (10 °C min<sup>-1</sup>) in N<sub>2</sub> flow (20 mL min<sup>-1</sup>).

Basicity and acidity of MMOs were determined by the CO<sub>2</sub> and n-butylamine adsorption/desorption method, using the previous described TGA equipment. Approximately 15 mg of sample were treated at 450 °C for 20 min under dynamic nitrogen atmosphere (20 mL min<sup>-1</sup>). After 20 minutes, the sample was cooled at 50 °C (for basicity) or 120 °C (for acidity). Subsequently, the nitrogen atmosphere was changed for CO<sub>2</sub> (20 mL min<sup>-1</sup>) or N<sub>2</sub> saturated with n-butylamine (20 mL min<sup>-1</sup>) for 5 min. The increase of mass caused by the adsorption CO<sub>2</sub> or n-butylamine was correlated with the basic and/or acid sites of the MMOs.

Surface area was measured by the BET (Brunauer, Emmett and Teller) method (N<sub>2</sub> adsorption) using a Gemini VII surface area analyzer (Micromeritics). Prior to BET measurements, the samples (50 mg) had the humidity removed by 30 minutes at 120 °C and N<sub>2</sub> flow.

### **1.3.1. LDH and MMO characterization data**

Fig. S1 shows XRD patterns found for both hydrotalcites with (A) and without (B) 20 mol% substitution of Mg<sup>2+</sup> by Cu<sup>2+</sup>. For both materials, seven diffraction peaks were found, corroborating with the XRD patterns previously reported for these materials.<sup>2,3</sup>

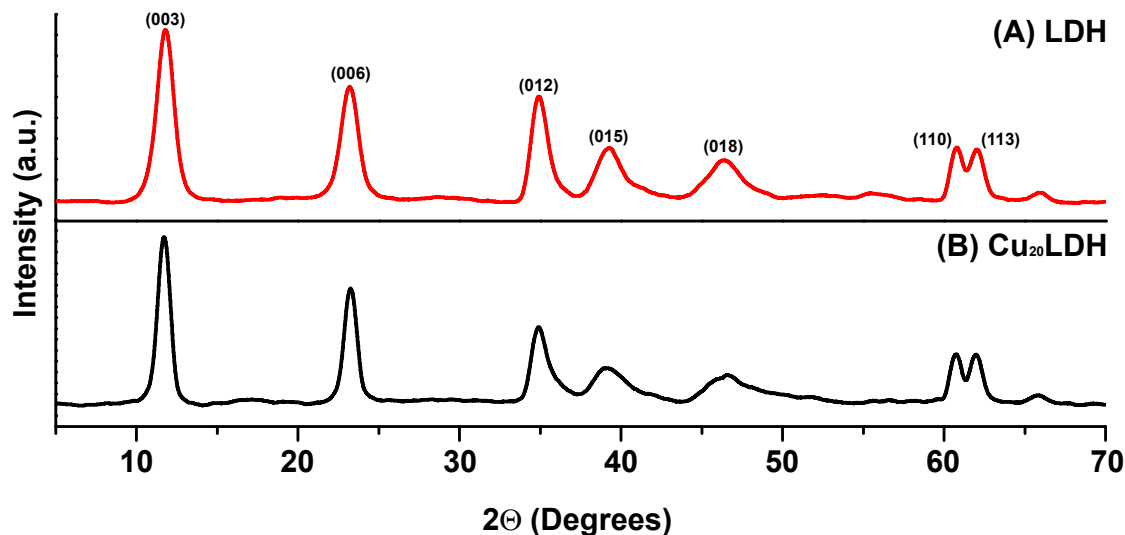

**Fig. S1.** XRD patterns for LDH (A) and Cu<sub>20</sub>LDH (B). The Miller indexes are presented in top of the diffraction peaks.

Using the Scherrer equation was possible to calculate average cations distance (*a*), interlamellar distance (*c*) and crystallite size (*D*). Table S1 resumes these values.

**Table S1.** Crystallographic parameters for hydrotalcites (LDH).

| Hydrotalcites        | Crystallographic Parameters |              |              |
|----------------------|-----------------------------|--------------|--------------|
|                      | <i>a</i> (Å)                | <i>c</i> (Å) | <i>D</i> (Å) |
| LDH                  | 3.0                         | 16.8         | 203.9        |
| Cu <sub>20</sub> LDH | 3.0                         | 15.2         | 78.8         |

The partial substitution of Mg<sup>2+</sup> for Cu<sup>2+</sup> changed the interlamellar distance (*c*) and the crystallite size (*D*) of the Cu<sub>20</sub>LDH material. Both observations are coherent with previous reports in the literature.<sup>2,3</sup>

Infrared spectroscopy (ATR-FTIR) of the LDHs showed the expected bands for this type of material, as indicated in Fig. S2. The partial substitution of Mg<sup>2+</sup> by Cu<sup>2+</sup> did not lead to major changes comparing the IR spectra of both materials. Thus, since the IR fingerprint of the LDH materials is present, the IR contributed to confirm the successful synthesis of LDH materials.

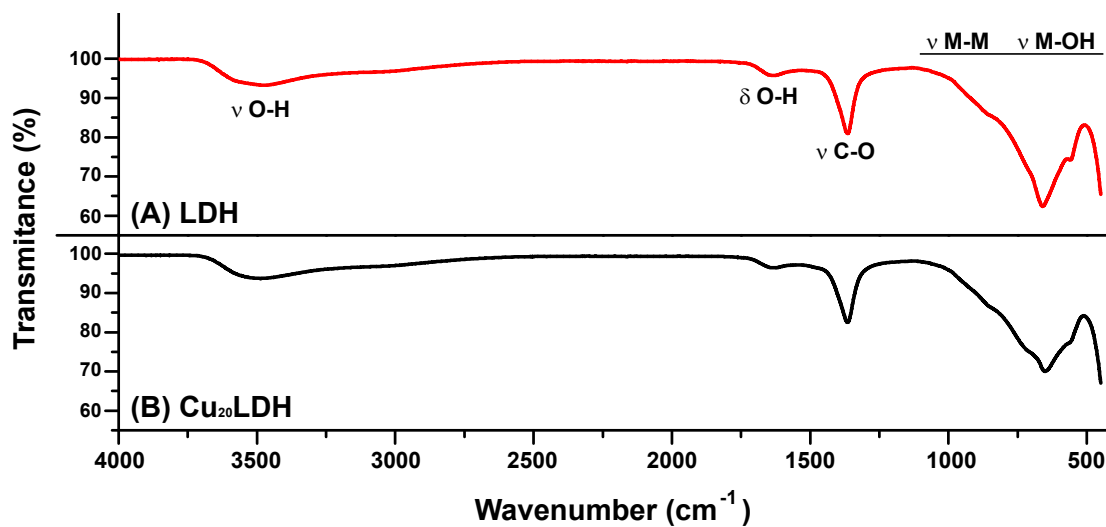

**Fig. S2.** ATR-FTIR spectra of LDH (A) and Cu<sub>20</sub>LDH (B).

Thermogravimetric analysis of LDH and Cu<sub>20</sub>LDH were performed aiming to verify the weight loss of both above-mentioned materials, Fig. S3. It is expected two thermal events for LDH materials: the first one in the range of 50 to 150 °C due to the loss of intralamellar and surface adsorbed water molecules and a second one in the range of 150 to and 350 °C due to the intralamellar carbonate decomposition. Both materials showed the two expected thermal events and the percentage of weight loss are coherent with previous data reported for LDH materials.<sup>2,3</sup>

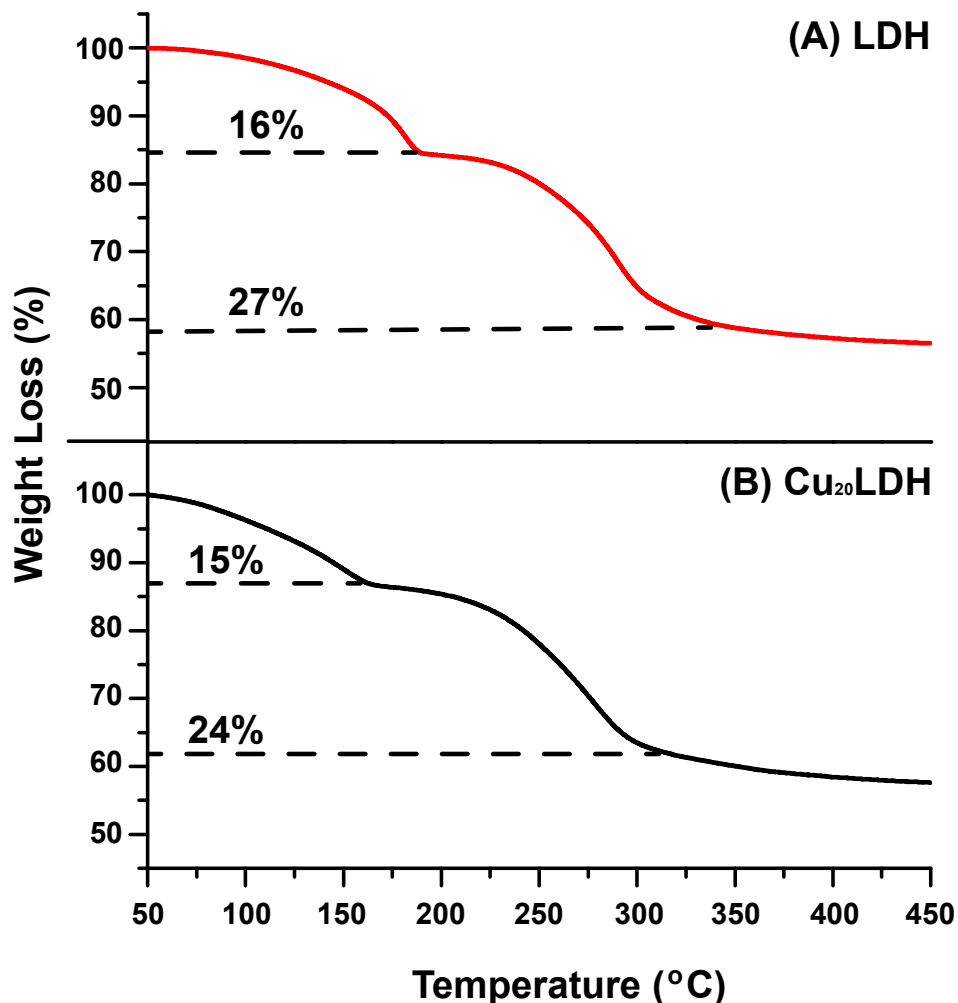

**Fig. S3.** TGA curves for LDH (A) and Cu<sub>20</sub>LDH (B).

As observed in TGA curves of Fig. S3 the LDH materials in temperatures higher than 350 °C lost around 40% of weight due to the water and carbonate removal. These thermal events change the LDH structure, giving rise to the mixed metal oxides (MMO). On this perspective, the LDHs were submitted to calcination procedure (5h at 450°C) to completely transform LDHs to MMOs.

After calcination, the samples now referred as MMO and Cu<sub>20</sub>MMO were submitted to XRD analysis. The XRD patterns for MMOs are depicted in Fig. S4.

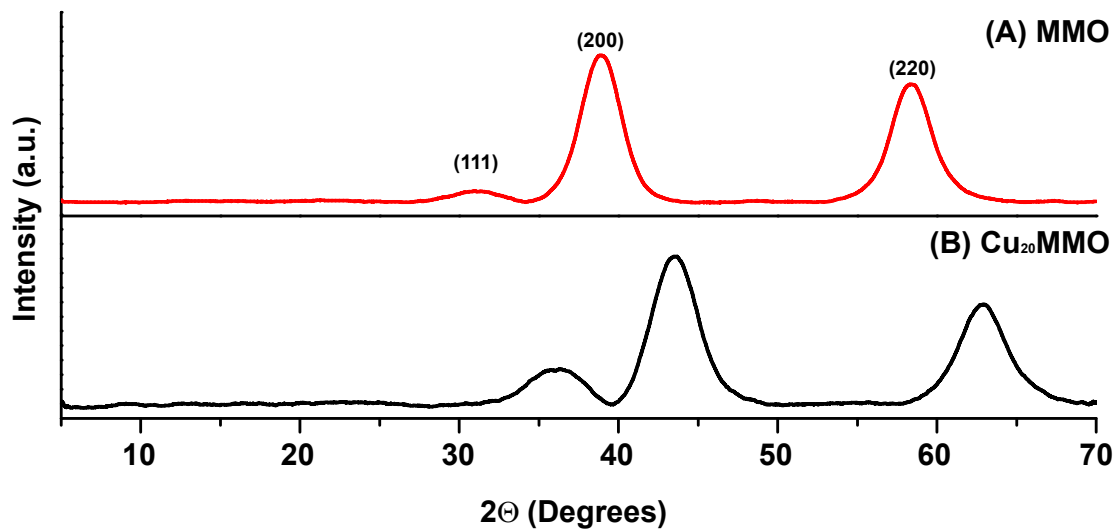

**Fig. S4.** XRD patterns for MMO (A) and Cu<sub>20</sub>MMO (B). The Miller indexes are presented in top of the diffraction peaks.

Comparing the XRD patterns of Fig. S1 and Fig. S4, it indicates the completely conversion of LHDs into MMOs. Also, the pattern of three peaks observed are coherent with LDH materials transformed into MMO.<sup>2,3</sup>

Finally, the obtained MMOs were submitted to surface area and acidity/basicity measurements. Table S2 shows the values found for MMO and Cu<sub>20</sub>MMO.

**Table S2.** Surface area ( $S_{\text{BET}}$ ), acidity and basicity for MMO and Cu<sub>20</sub>MMO.

| Mixed Metal               | $S_{\text{BET}}$           | Basicity                          | Acidity                            |
|---------------------------|----------------------------|-----------------------------------|------------------------------------|
| Oxide                     | $\text{m}^2 \text{g}^{-1}$ | $\text{mmols CO}_2 \text{g}^{-1}$ | $\text{mmols n-butylamine g}^{-1}$ |
| <b>MMO</b>                | $98.4 \pm 1.6$             | 0.93                              | 8.08                               |
| <b>Cu<sub>20</sub>MMO</b> | $102.6 \pm 1.9$            | 1.96                              | 6.83                               |

The partial substitution of Mg<sup>2+</sup> by Cu<sup>2+</sup> did not lead substantial changes on the surface area values. However, the Cu<sub>20</sub>MMO presented lower values of acidity and basicity comparing to the reference material. Also, the Cu<sub>20</sub>MMO has more acidity than basic sites, which is the opposite observed for MMO. The surface area acidity and

basicity values found are in agreement with previously ones reported in the literature for this kind of material.<sup>2,3</sup>

Although the calcination of the LDHs to obtention of MMOs was performed at 450°C and the catalytic reactions run at 550 and 600°C, there is no difference in the resulting MMO, as already described by Wang *et. al.*<sup>4</sup> The Fig. S5 below shows the XRD patterns for the Cu<sub>20</sub>MMO calcined at 450, 550 and 600°C indicating no structural or phase segregation in the catalyst.

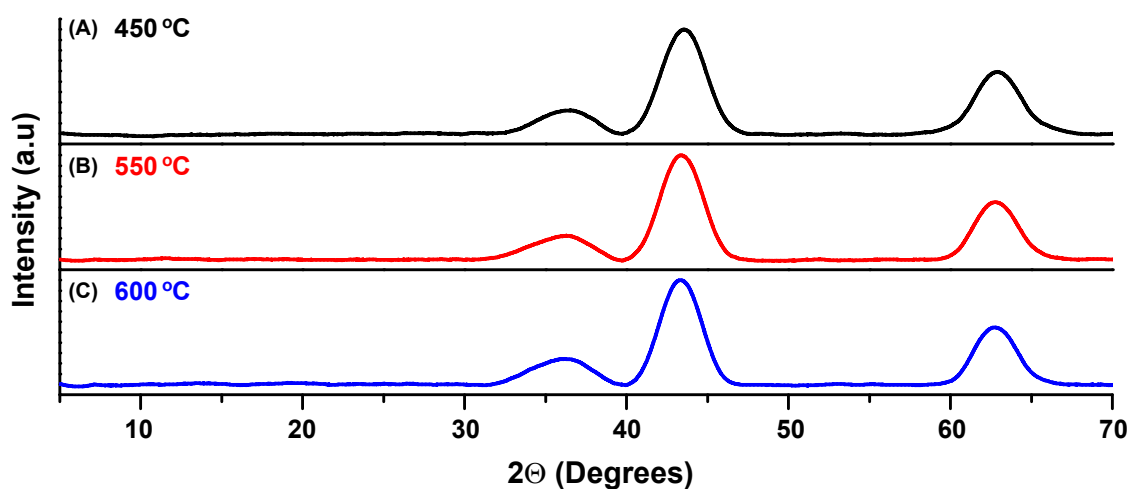

**Fig. S5.** XRD patterns for Cu<sub>20</sub>MMO calcined at different temperatures. (A) 450°C; (B) 550°C and (C) 600°C.



## 1.4 Catalytic Reactions

The catalytic reactions were performed in a homemade fixed bed reactor as shown in the Fig.S6, below:

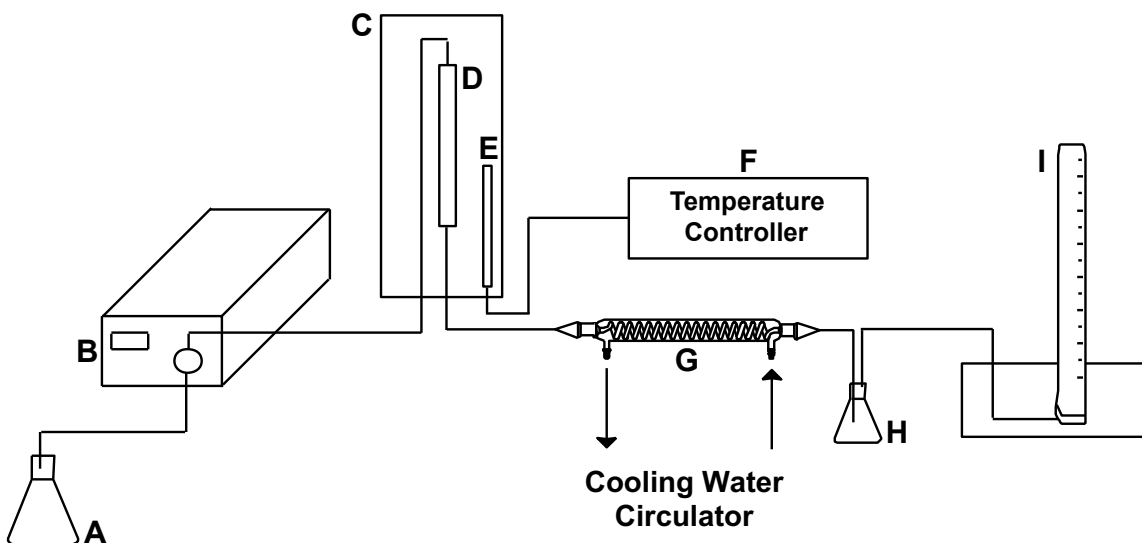

**Fig.S6.** Schematic representation of the fixed bed reactor. **A:** reactant reservoir; **B:** piston pump; **C:** oven; **D:** reactor column; **E:** thermocouple; **F:** temperature controller; **G:** condenser; **H:** products reservoir; **I:** graduated cylinder for gas measurement.

The reactant (100% 1-butanol or 1-butanol:methanol 7:3 (v/v) mixture) was pumped in a flow of  $0.2 \text{ mL min}^{-1}$ . In a first step, the reactant was vaporized by the oven heating in stainless steel tubing that was placed in parallel to the reactor column. This step aimed to guarantee that only reactant vapor passed through the reactor column and also avoided the utilization of an inert gas to drag the reactant.

The reactor column ( $L = 12.0 \times \text{O.D.} = 1.0 \times \text{I.D.} = 0.5 \text{ cm}$ ) was packed with a mixture of 1.4 g of silica gel and 0.3 g of the desired catalyst. The reactant vapor flow percolated the column and was readily condensed after the column end by a continuous cooling-water circulator ( $-2^\circ\text{C}$ ). The condensed products were collected in the products reservoir (kept at  $-2^\circ\text{C}$ ) and the gas was conducted to a graduated cylinder aiming to measure the amount of gases generated by the reaction. Samples were collected every

30 minutes of reaction (total of 180 minutes) in 10 mL vials (hermetically sealed). The vials were kept at -20°C until the analysis.

The condensed products were identified and quantified by GC-MS, employing a Perkin-Elmer Clarus 680 chromatograph coupled with a 600T mass spectrometer detector. The analysis was performed in a BD-EN14103 capillary column (Agilent, 30 m x 0.32 mm x 0.25  $\mu\text{m}$ ), with injection volume of 1.0  $\mu\text{L}$  (injector temperature of 250 °C). GC oven temperature program: isotherm for 10 minutes at 40 °C; heating at 10 °C  $\text{min}^{-1}$  until 160 °C; heating at 2 °C  $\text{min}^{-1}$  until 180 °C; heating at 10 °C  $\text{min}^{-1}$  until 240 °C; holding for 2 minutes at 240 °C. The ionization source was kept at 70eV and the m/z range was 40 to 300.

The samples for GC-MS analysis were prepared by adding 10  $\mu\text{L}$  of the collected reactor effluent, 10  $\mu\text{L}$  of ethyl dodecanoate as internal standard (final concentration of 17.2 ppm) and 980  $\mu\text{L}$  of GC-MS grade methanol. The quantification was performed by correlation between the internal standard and reference standard compounds (butanol; isoamyl alcohol; ethyl ether; methyl isobutyl ketone, ethyl hexanoate, gamma-valerolactone, 3,4-dimethoxybenzyl alcohol) by calculating the correlation factors.

## 2. Products distribution by time

**Graphics color code:** red – alkenes; dark blue – aromatics; light blue – aldehydes; yellow – ethers; dark green – alkanes, light green – alcohols; purple – esters; gray – ketones.

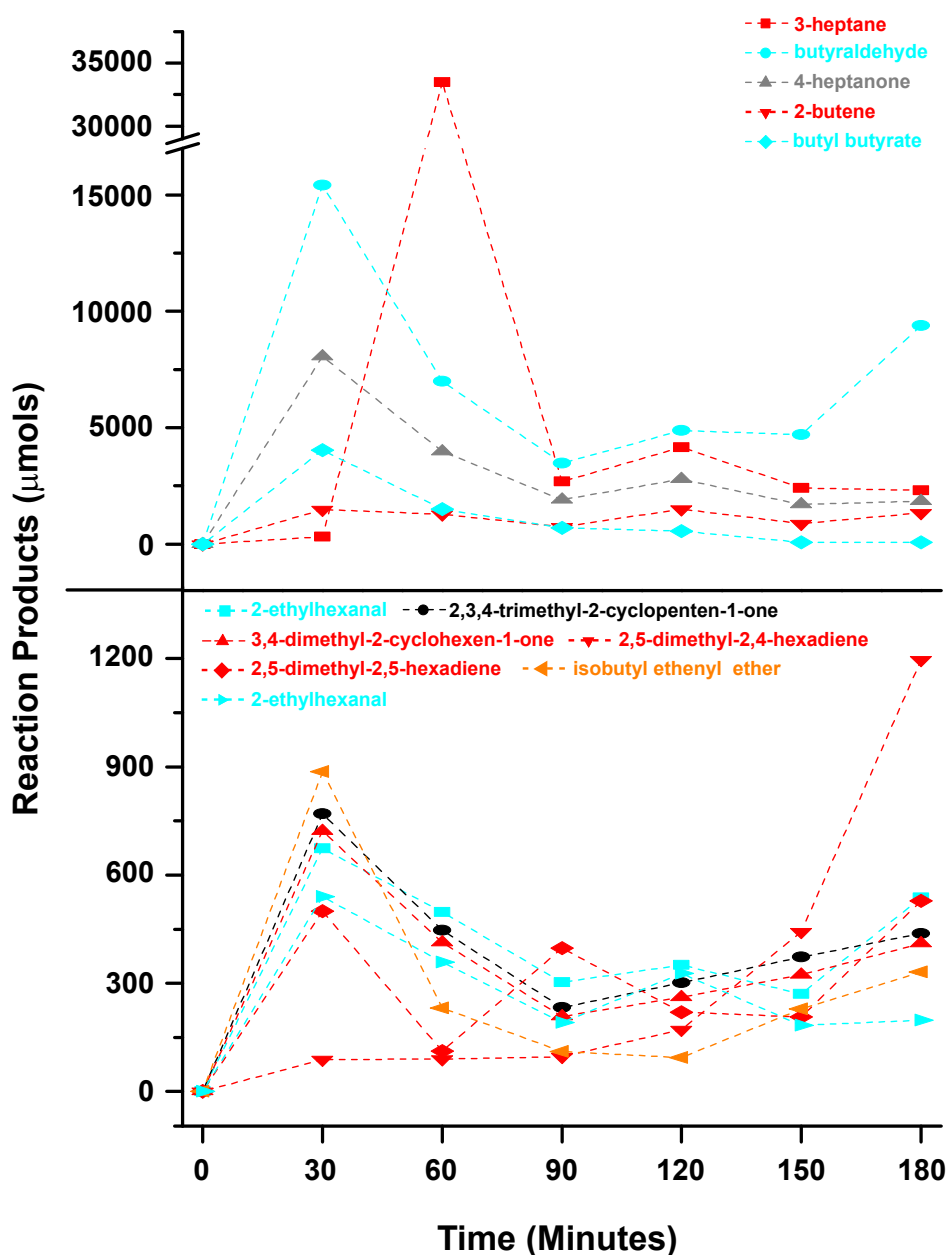

**Fig. S7.** Time profile of the main products found in the reaction of 1-butanol over  $\text{Cu}_{20}\text{MMO}$  catalyst. Conditions: Temp. =  $550^{\circ}\text{C}$ , 100% of 1-butanol, 3 hours of reaction.

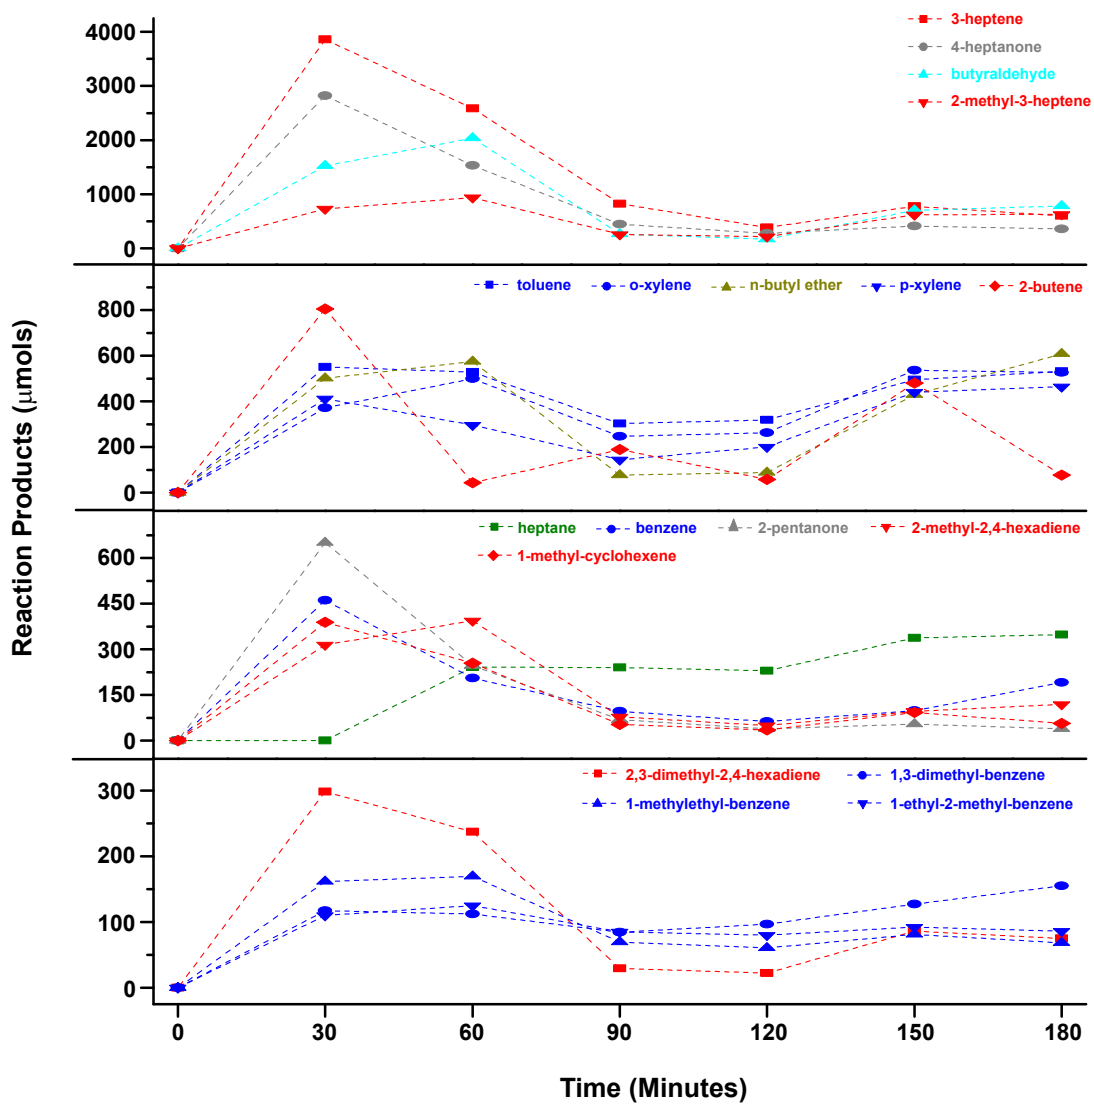

**Fig. S8.** Time profile of the main products found in the reaction of 1-butanol over  $\text{Cu}_{20}\text{MMO}$  catalyst. Conditions: Temp. =  $600^{\circ}\text{C}$ , 100% of 1-butanol, 3 hours of reaction.

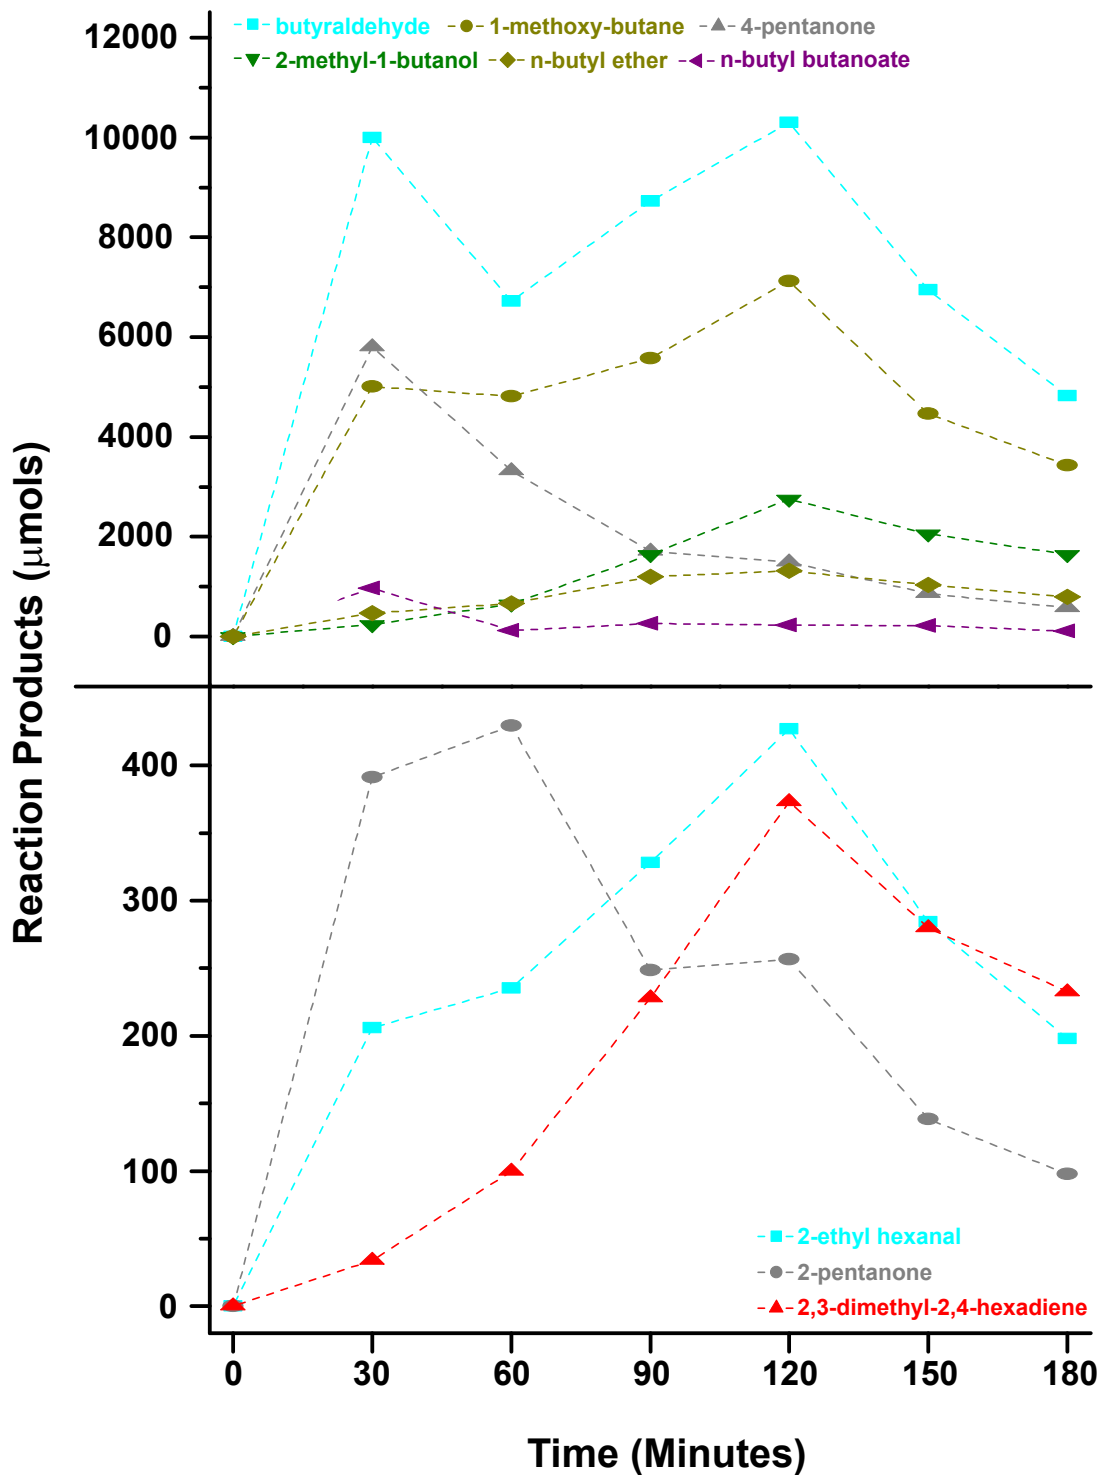

**Fig. S9.** Time profile of the main products found in the reaction of 1-butanol over  $\text{Cu}_{20}\text{MMO}$  catalyst. Conditions: Temp. =  $550^{\circ}\text{C}$ , 1-butanol:methanol 7:3 (v/v), 3 hours of reaction.

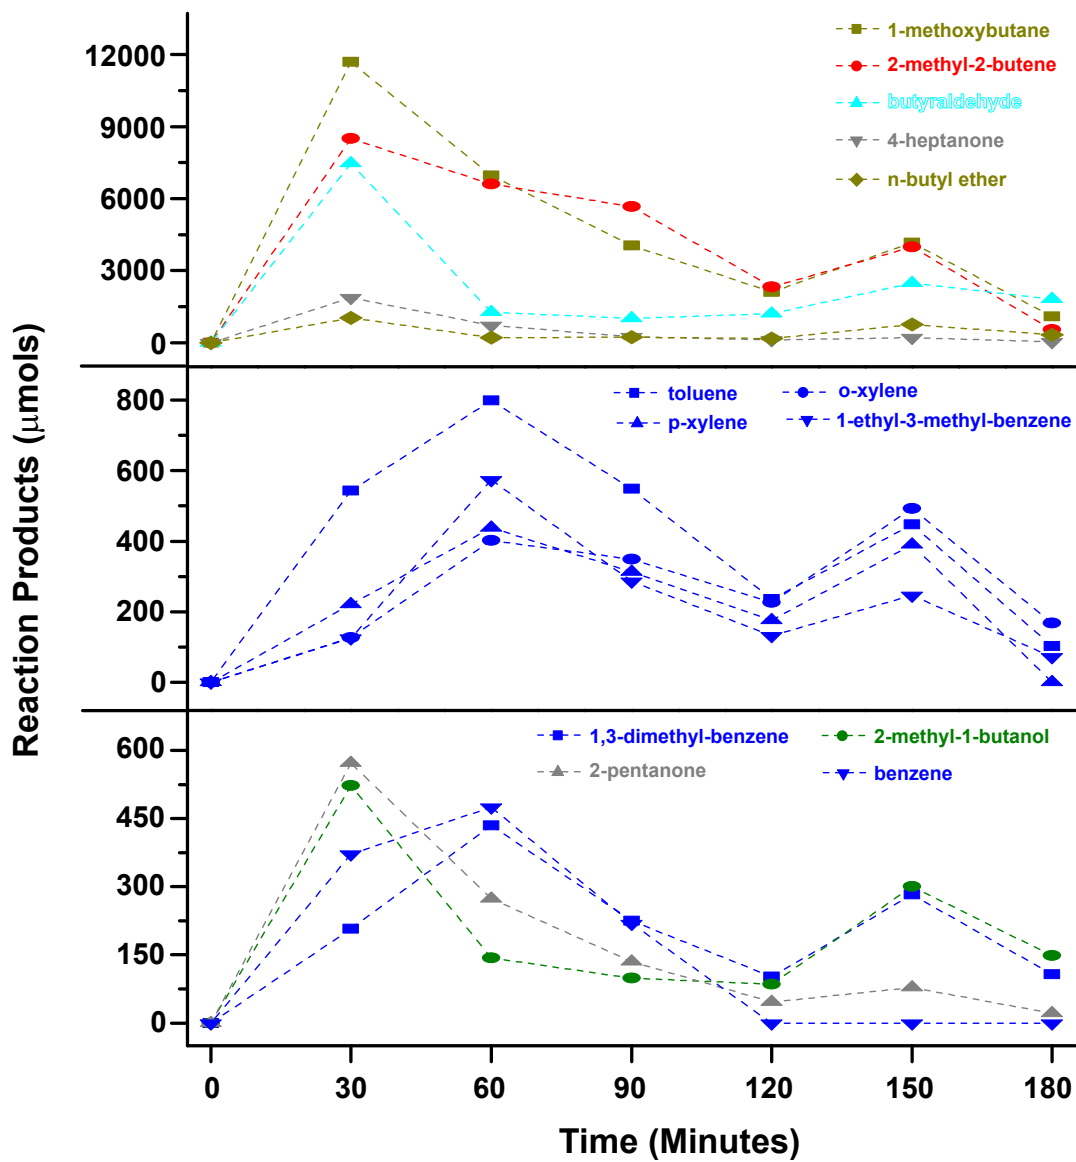

**Fig. S10.** Time profile of the main products found in the reaction of 1-butanol over  $\text{Cu}_{20}\text{MMO}$  catalyst. Conditions: Temp. =  $600^{\circ}\text{C}$ , 1-butanol:methanol 7:3 (v/v), 3 hours of reaction.

### 3. Catalyst characterization after reactions

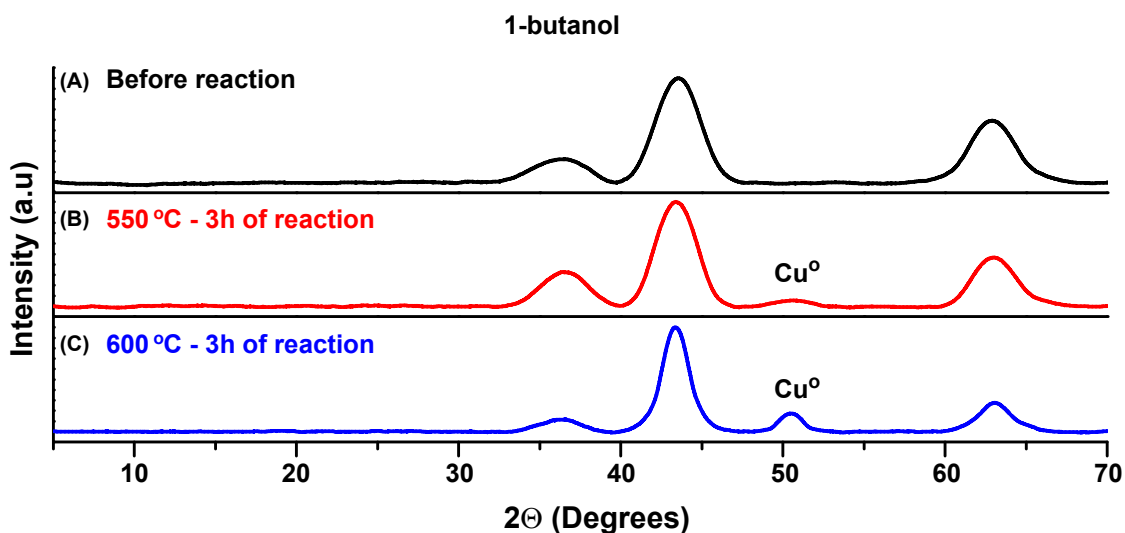

**Fig. S11.** XRD patterns for the  $\text{Cu}_{20}\text{MMO}$  catalyst with 100% of 1-butanol. (A) before reaction; (B) after 3 hours of reaction at 550°C. (C) after 3 hours of reaction at 600°C. The formation of  $\text{Cu}^0$  species are indicated in the XRD patterns (B) and (C).

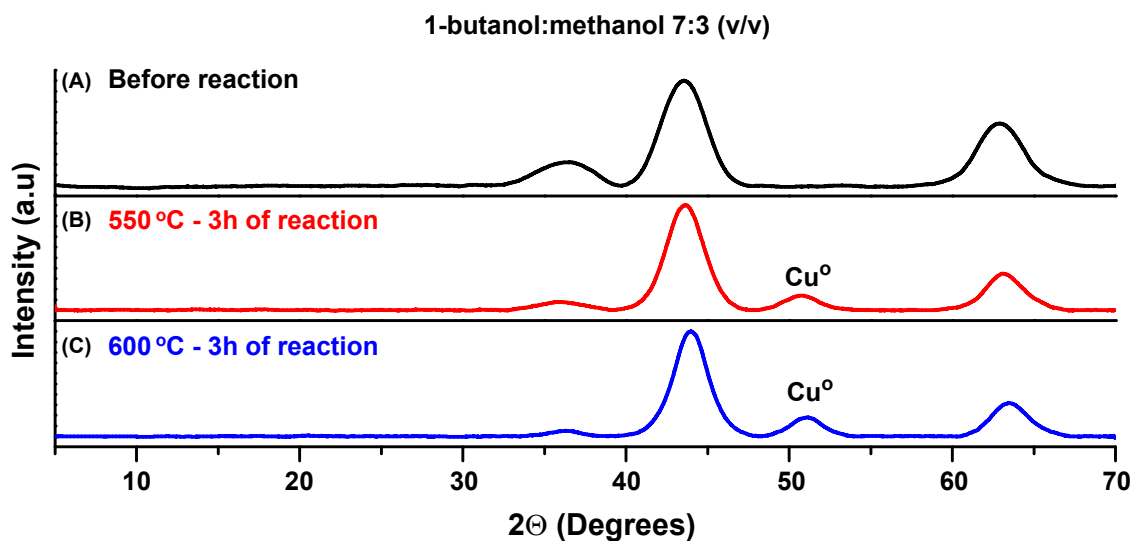

**Fig. S12.** XRD patterns for the  $\text{Cu}_{20}\text{MMO}$  catalyst with 1-butanol:methanol (7:3 v/v). (A) before reaction; (B) after 3 hours of reaction at 550°C. (C) after 3 hours of reaction at 600°C. The formation of  $\text{Cu}^0$  species are indicated in the XRD patterns (B) and (C).

## 4. Reaction products

### 4.1 – GC-MS total ion chromatograms (TIC)

**Fig. S13.** GC-MS Total Ion Chromatograms (TIC) for the reaction products. Conditions: Catalyst Cu<sub>20</sub>MMO; T = 550 °C; 100% of 1-butanol. The TICs were cut in three sections (A), (B) and (C) for better visualization.

**Fig. S14.** GC-MS Total Ion Chromatograms (TIC) for the reaction products. Conditions: Catalyst Cu<sub>20</sub>MMO; T = 600 °C; 100% of 1-butanol. The TICs were cut in three sections (A), (B) and (C) for better visualization.

**Fig. S15.** GC-MS Total Ion Chromatograms (TIC) for the reaction products. Conditions: Catalyst Cu<sub>20</sub>MMO; T = 550 °C; 1-butanol:methanol 7:3 (v/v). The TICs were cut in three sections (A), (B) and (C) for better visualization.

**Fig. S16.** GC-MS Total Ion Chromatograms (TIC) for the reaction products. Conditions: Catalyst Cu<sub>20</sub>MMO; T = 600 °C; 1-butanol:methanol 7:3 (v/v). The TICs were cut in three sections (A), (B) and (C) for better visualization.



Fig. S13 (A)

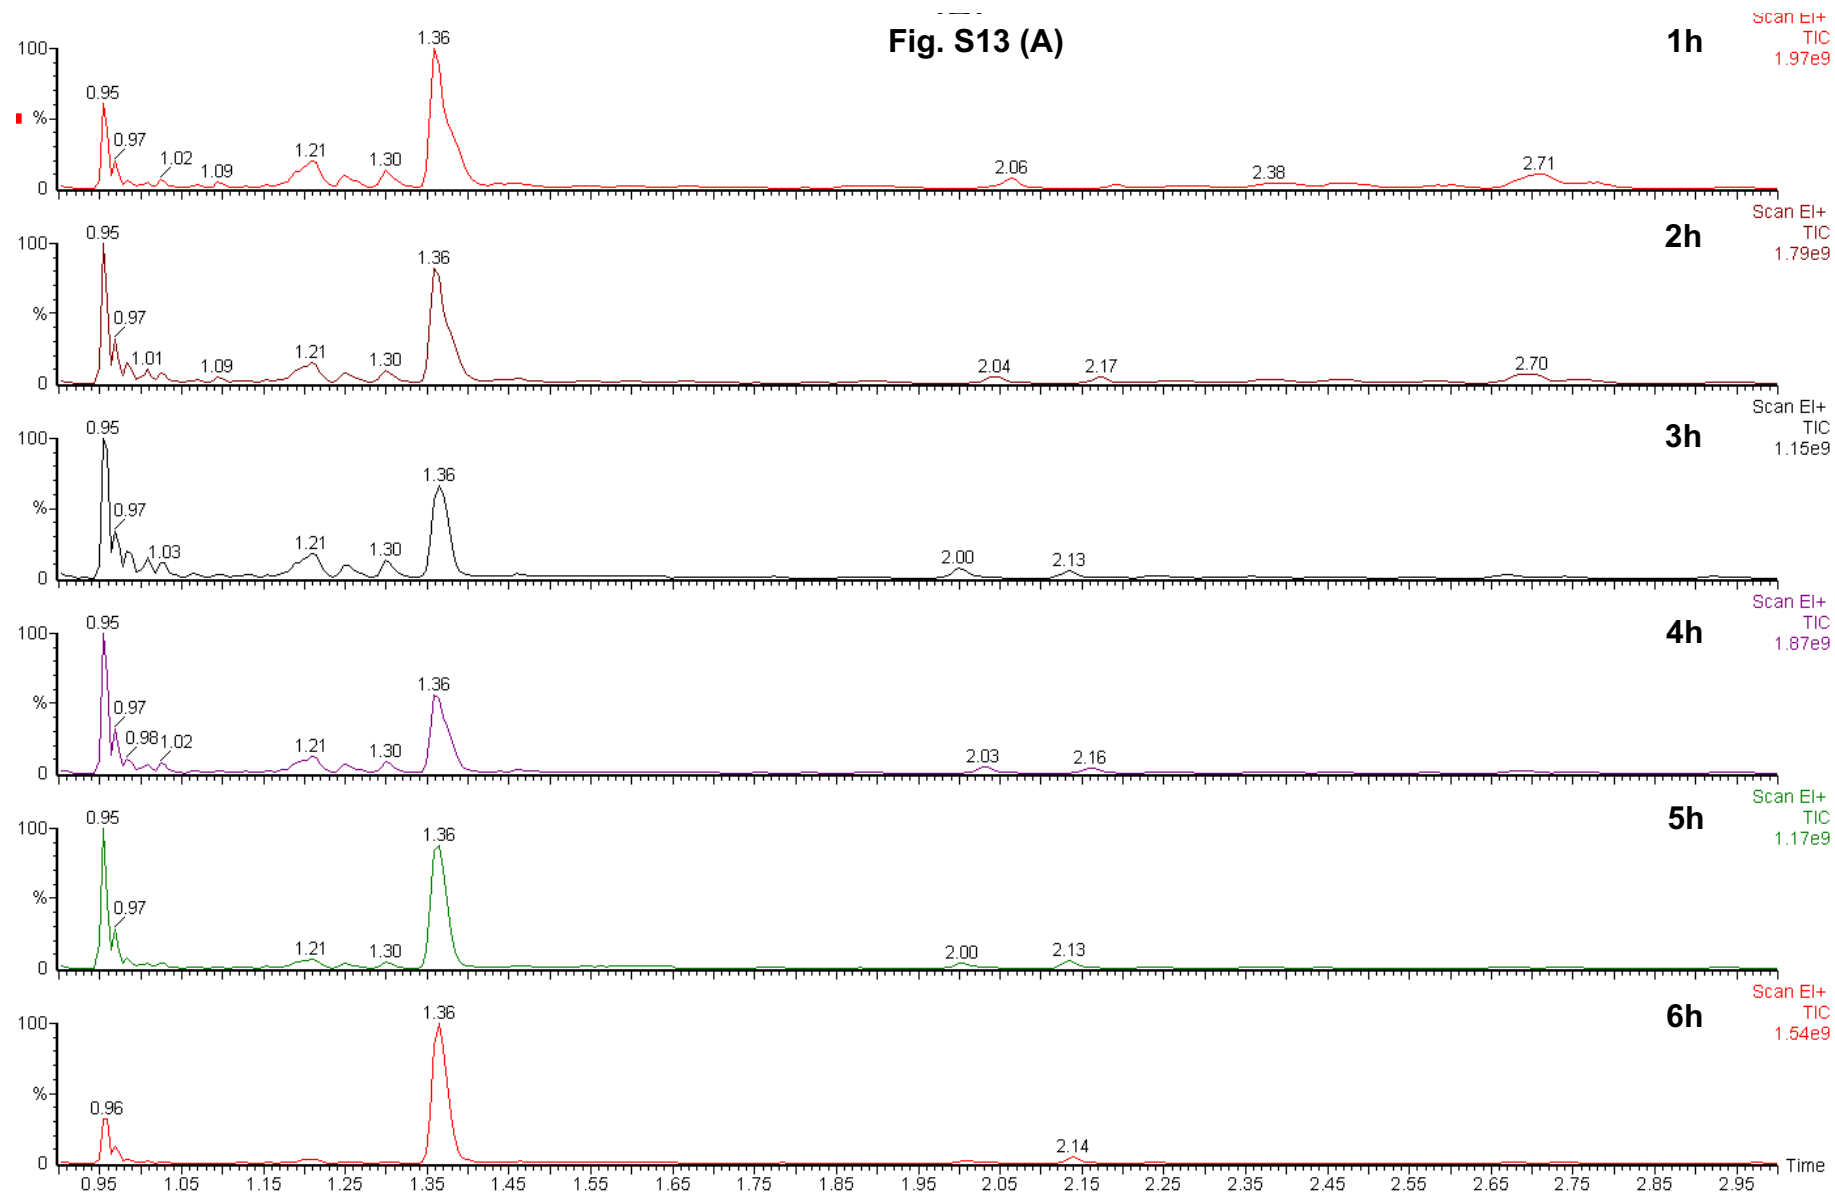

Fig. S13 (B)

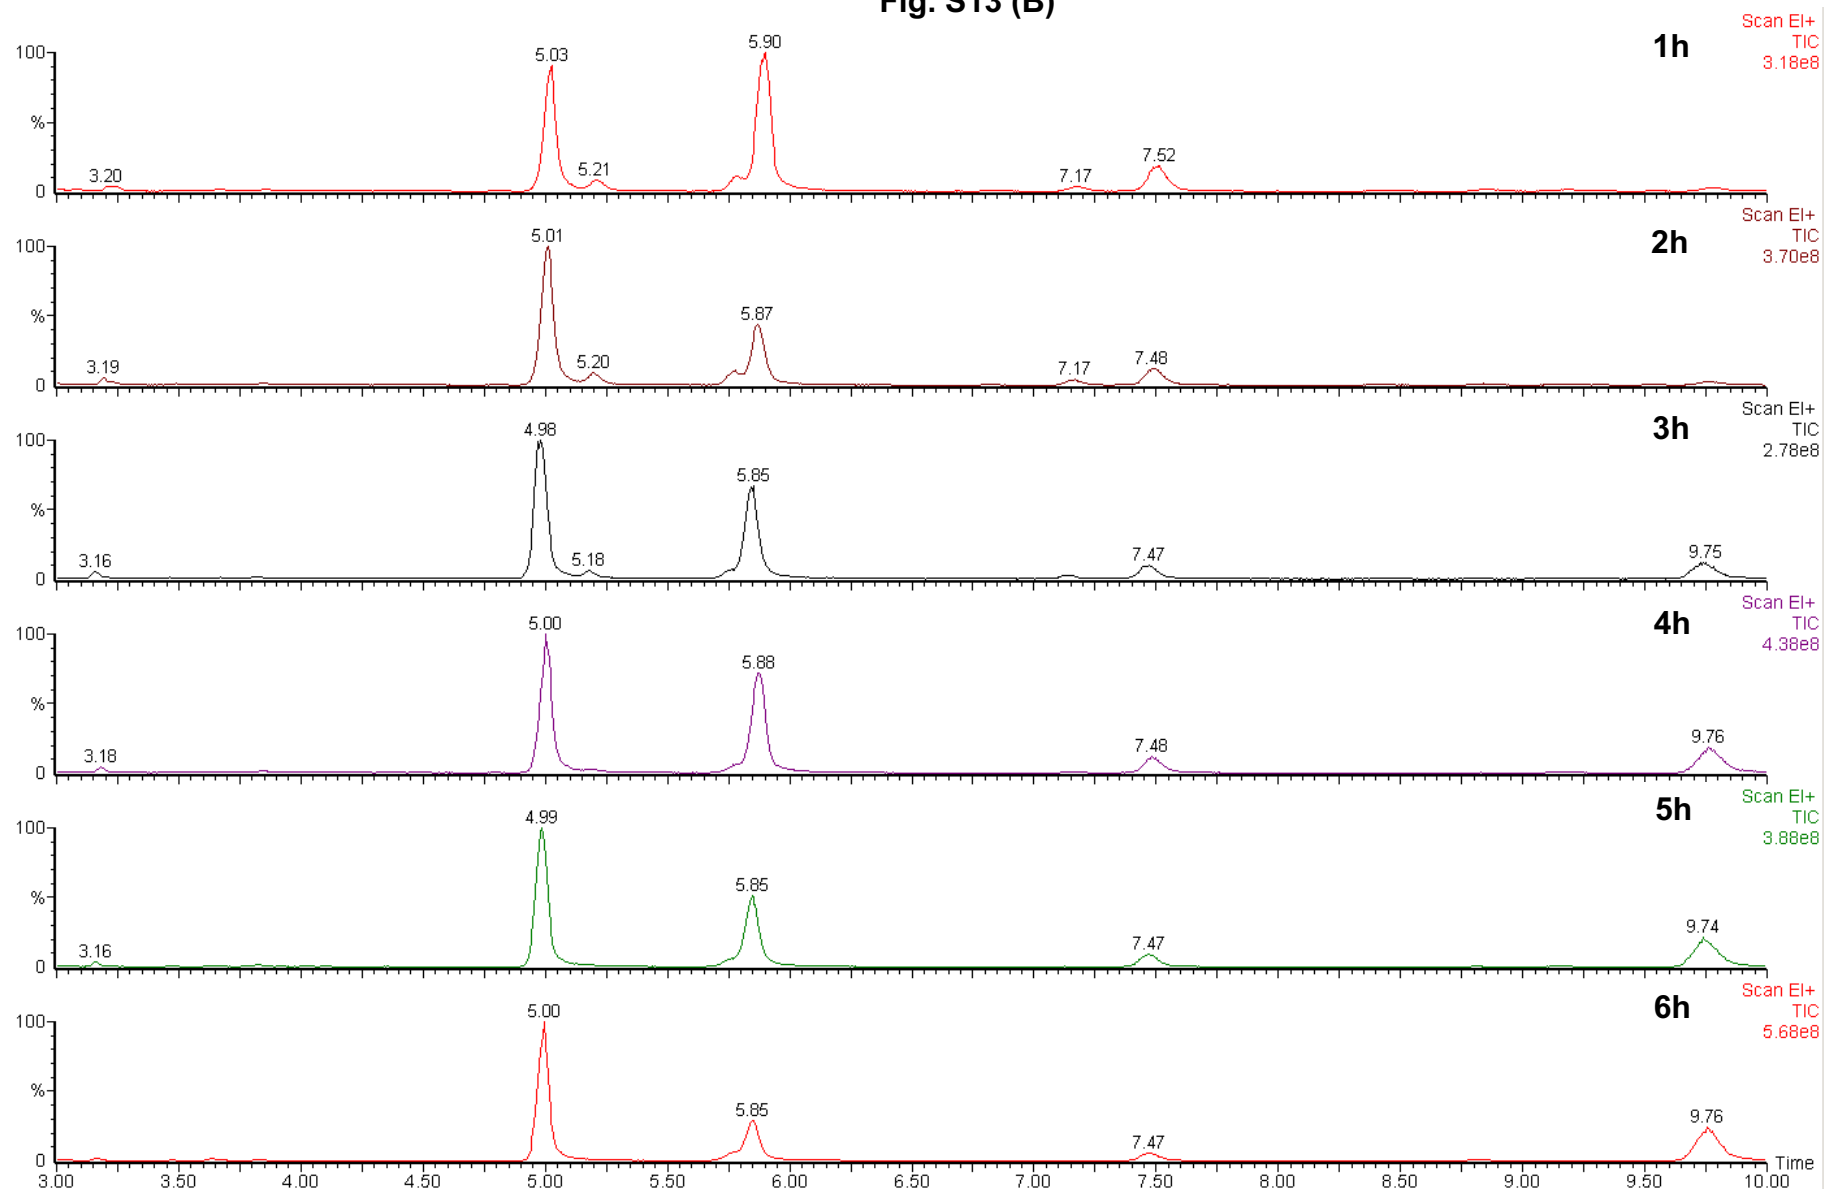

Fig. S13 (C)

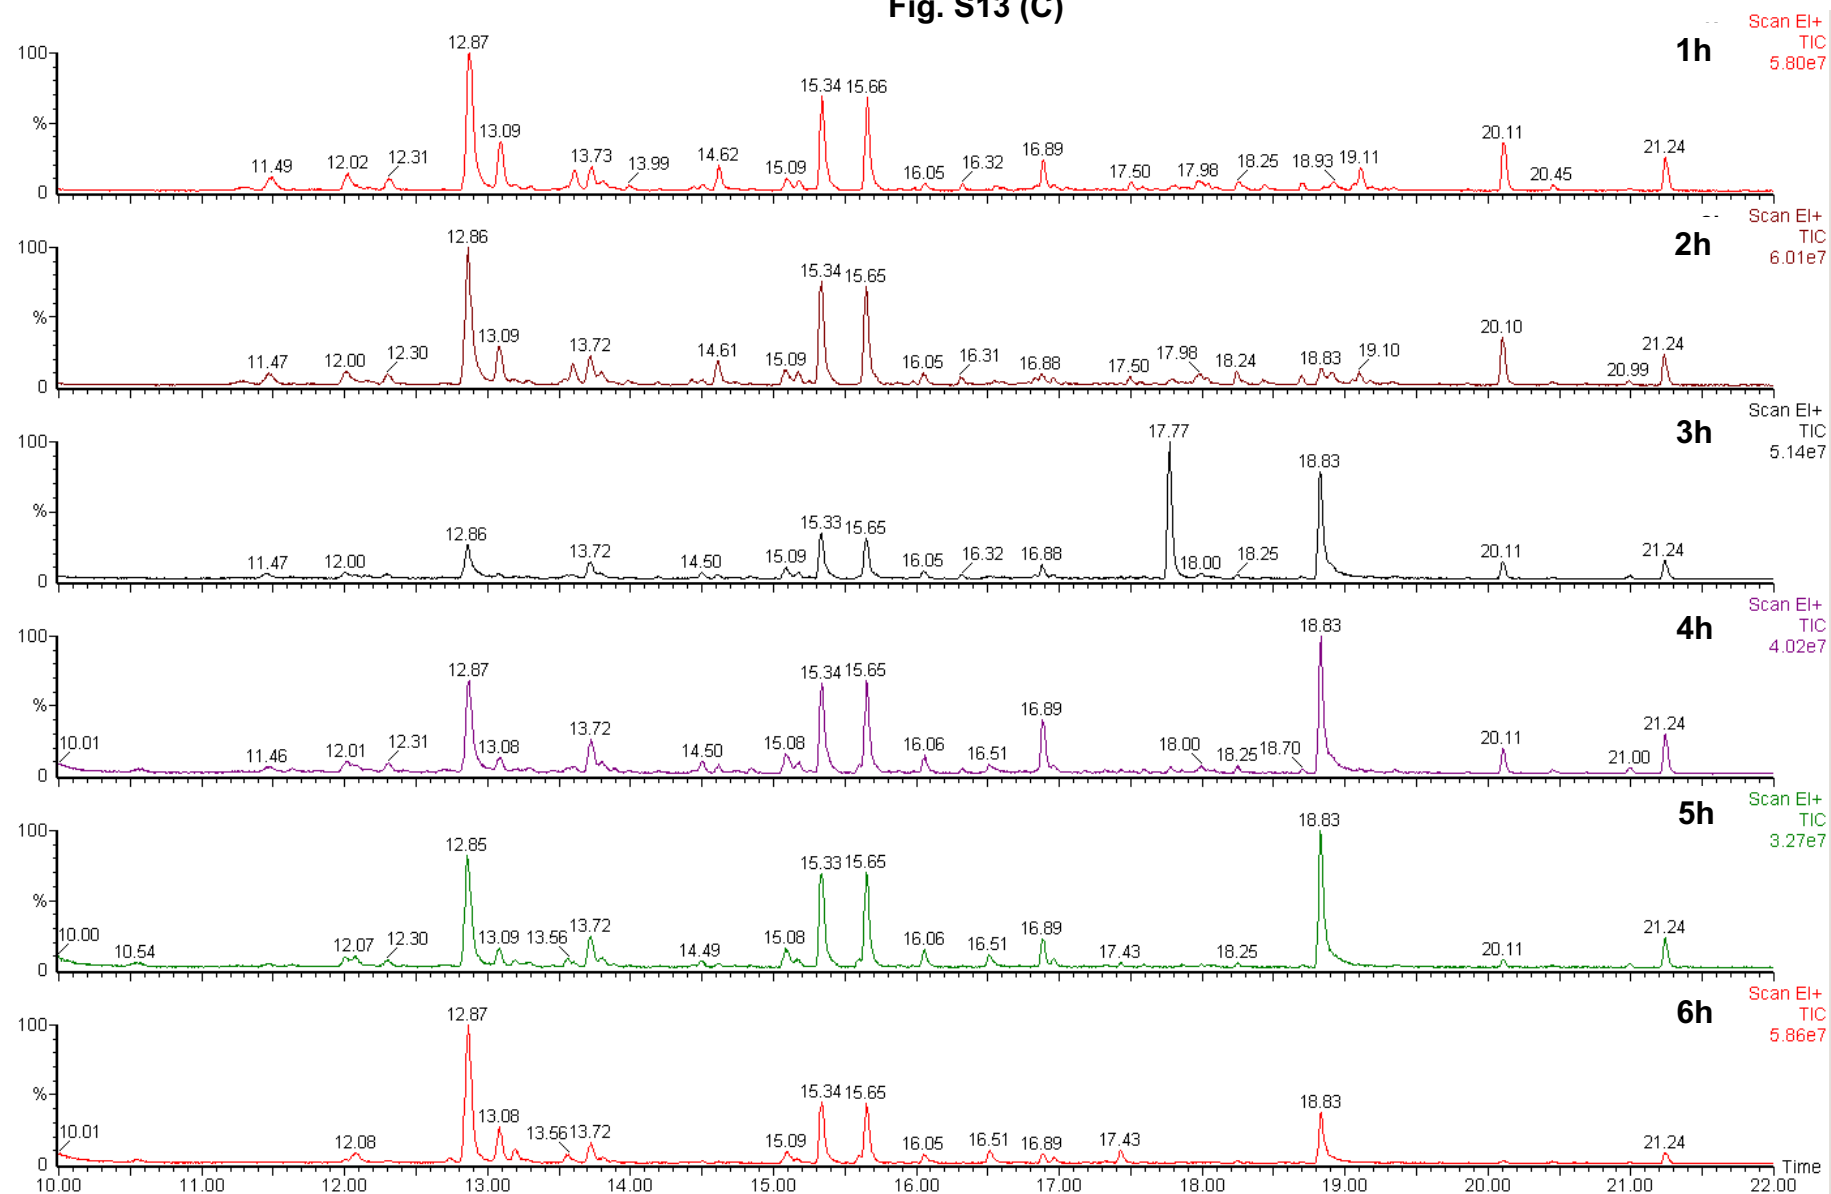

Fig. S14 (A)

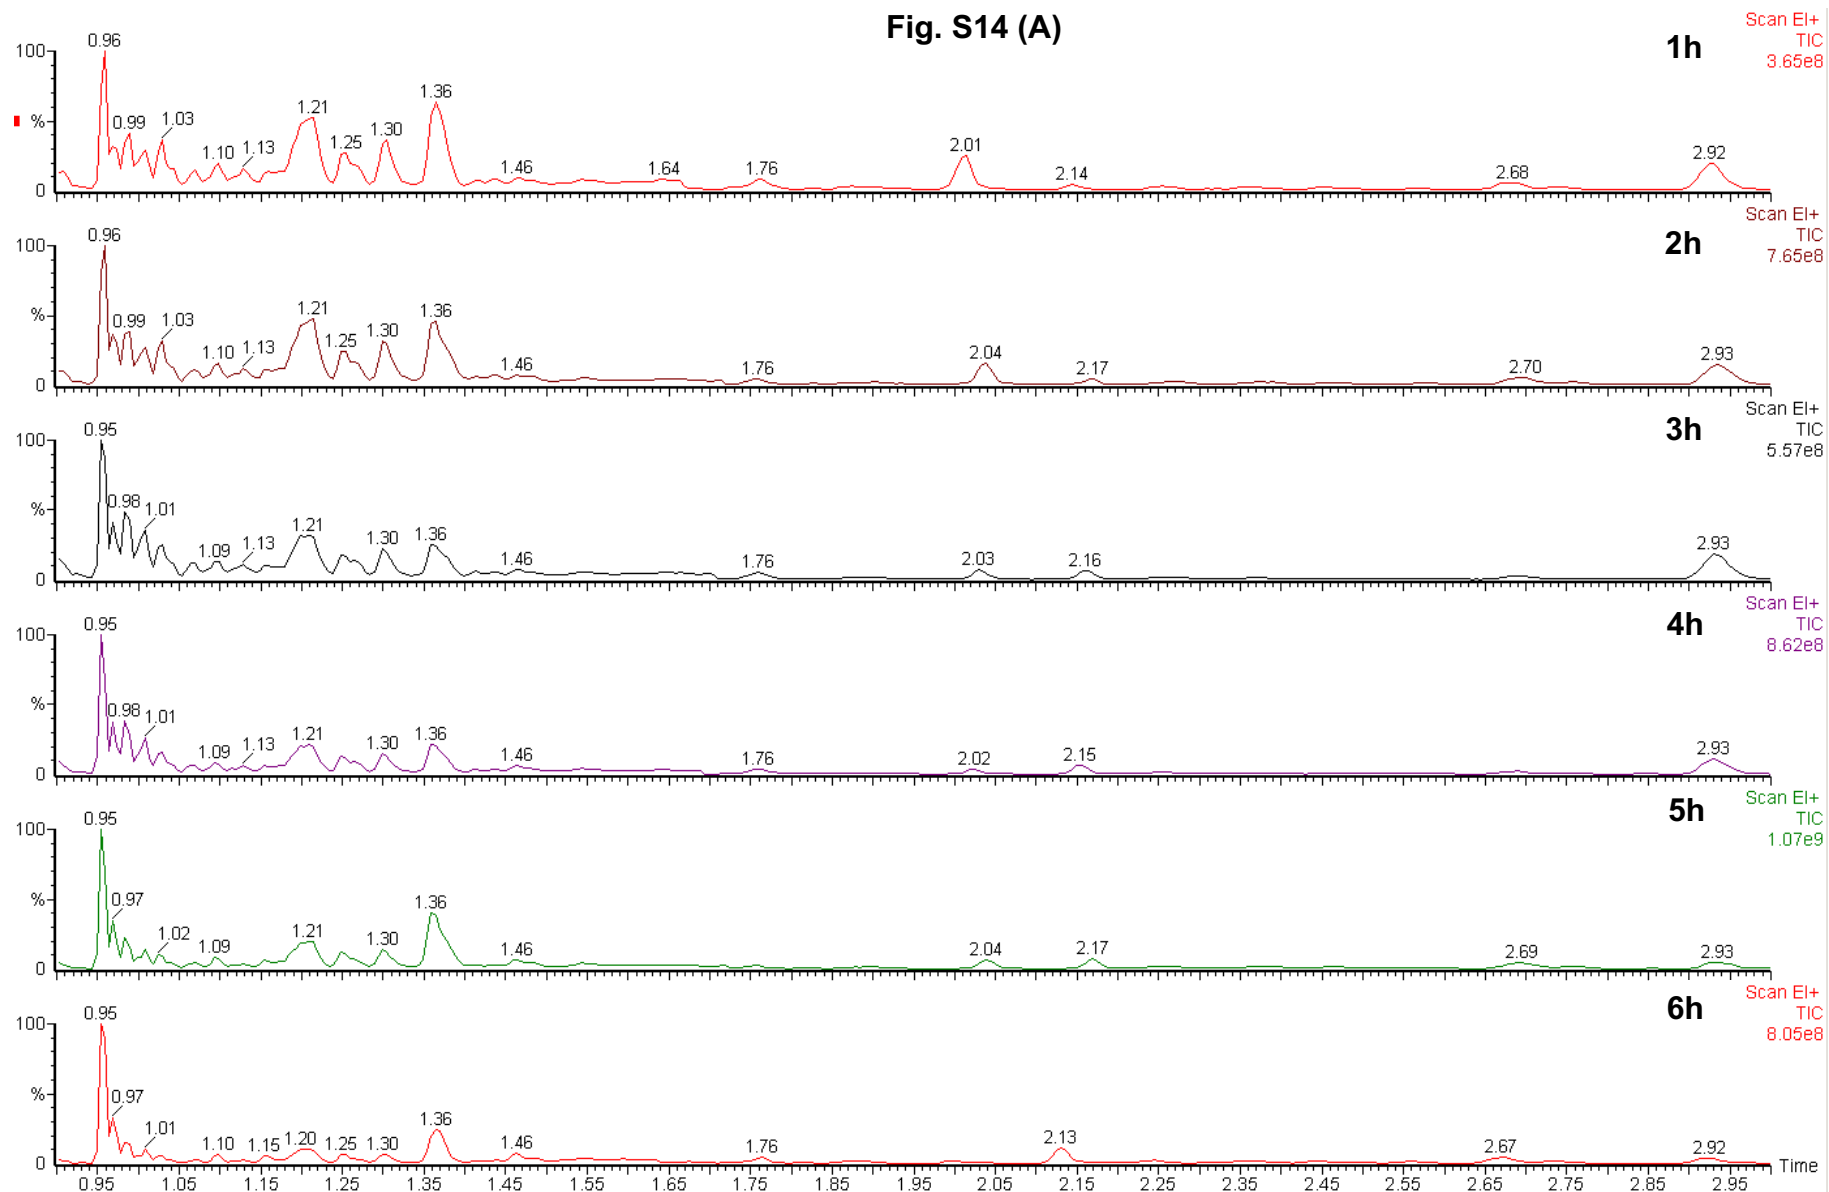

Fig. S14 (B)

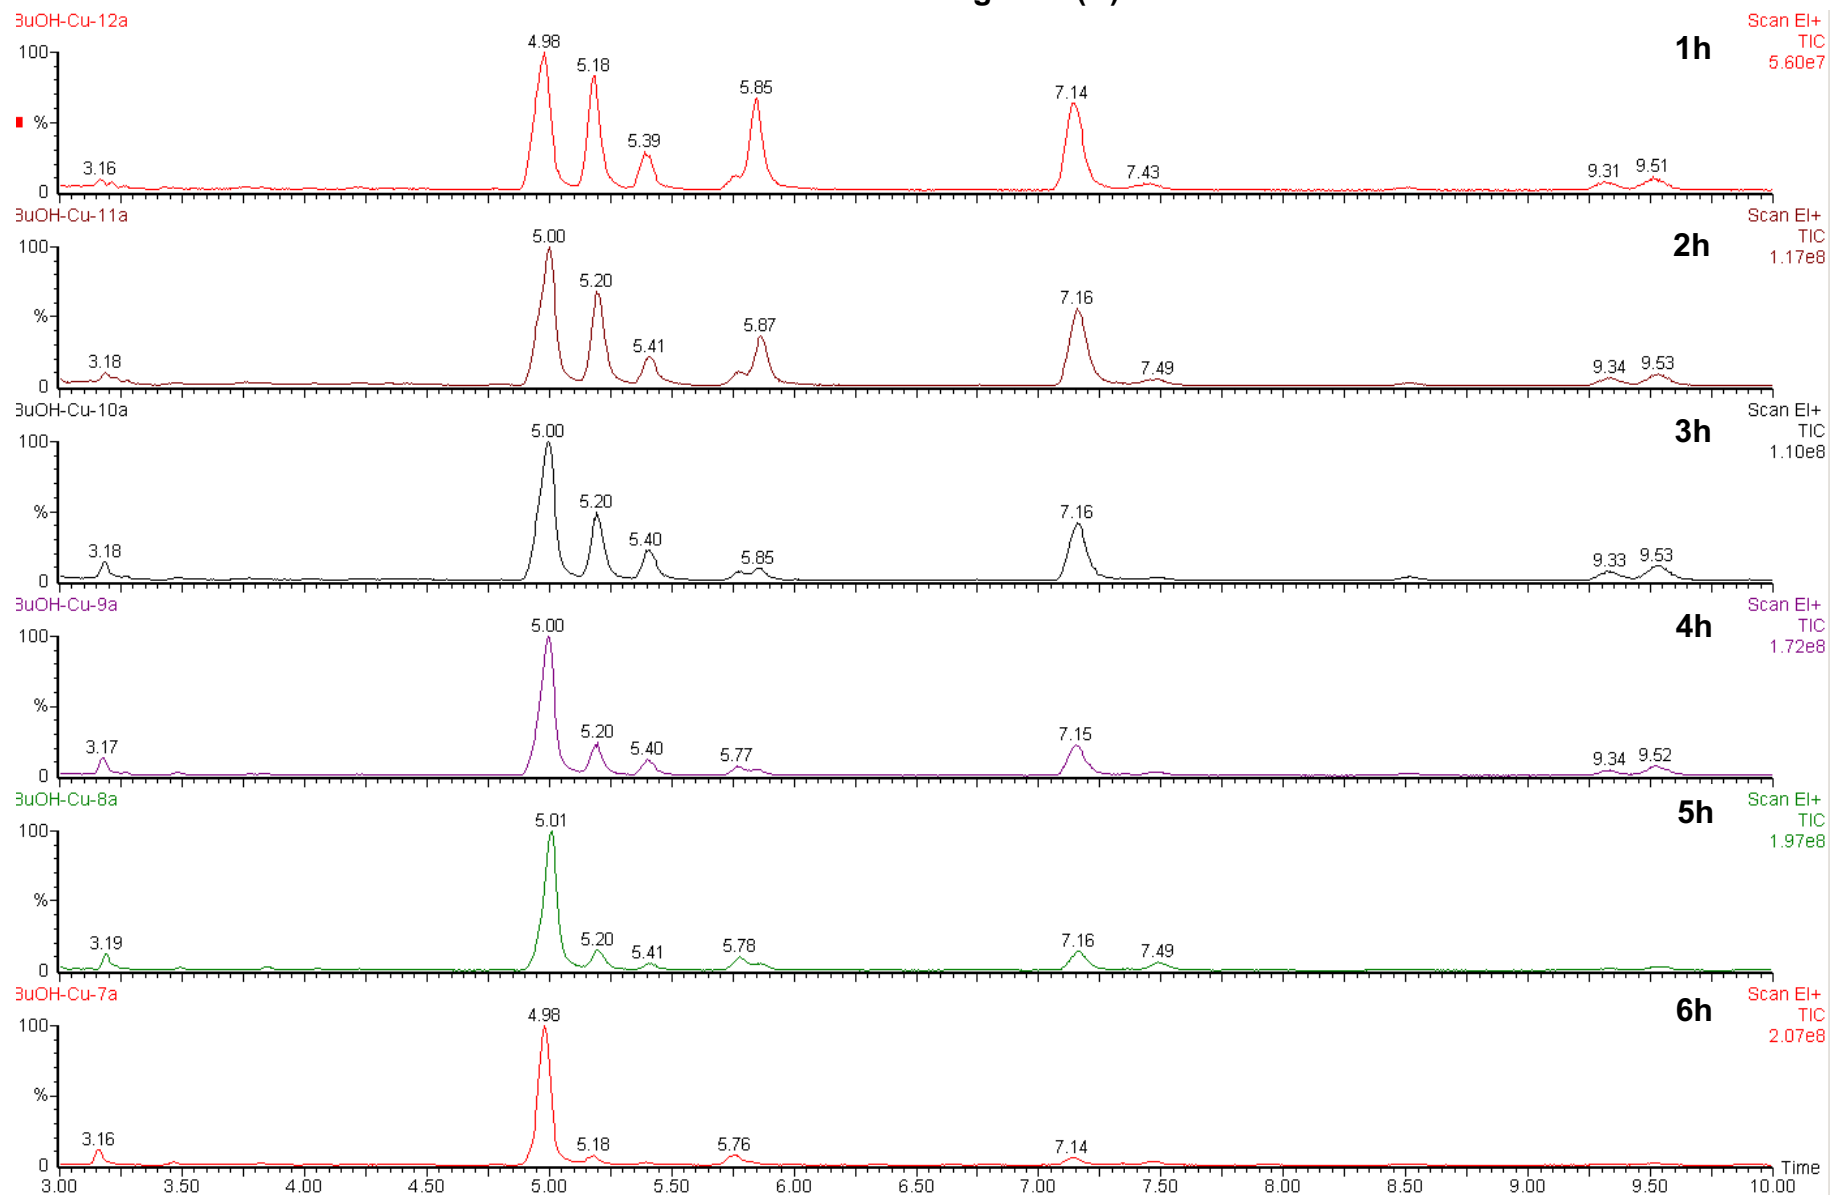

Fig. S14 (C)

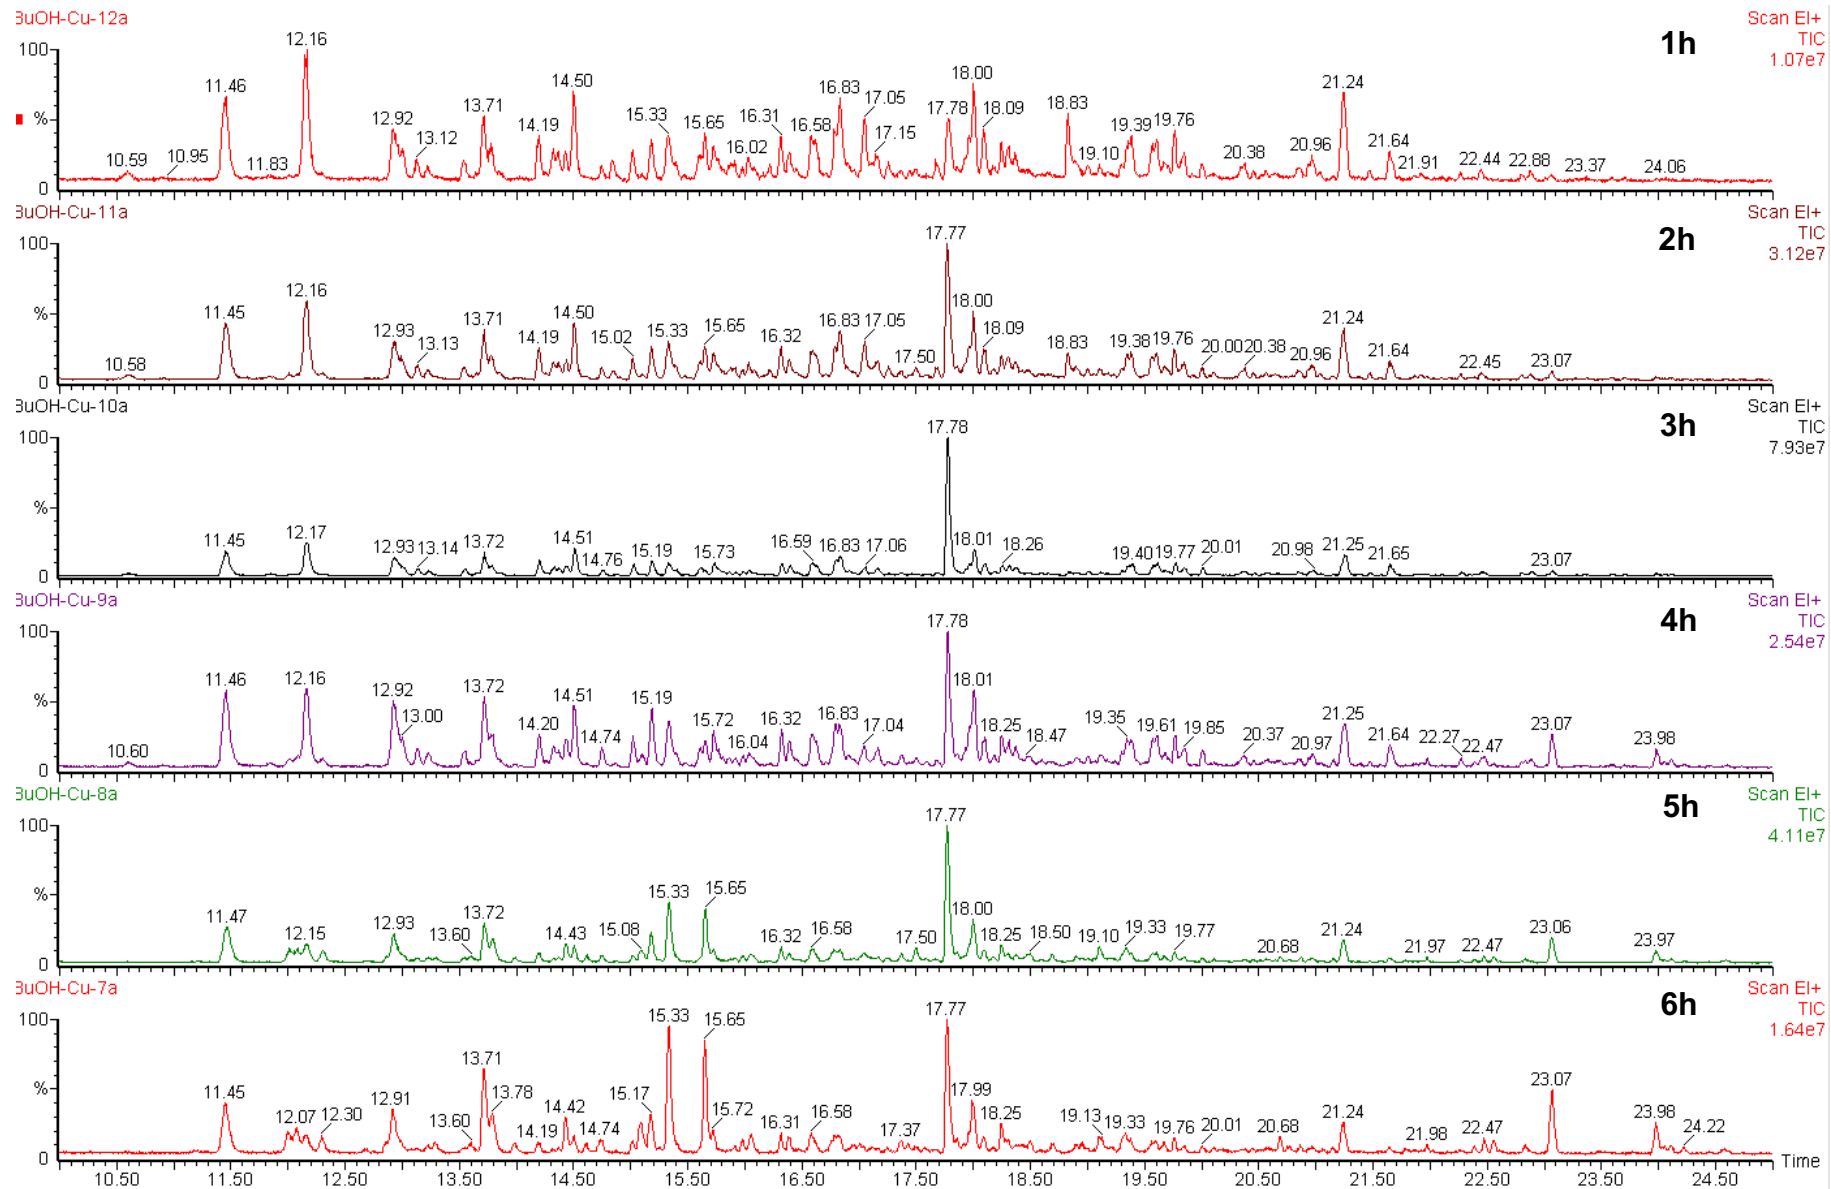

Fig. S15 (A)

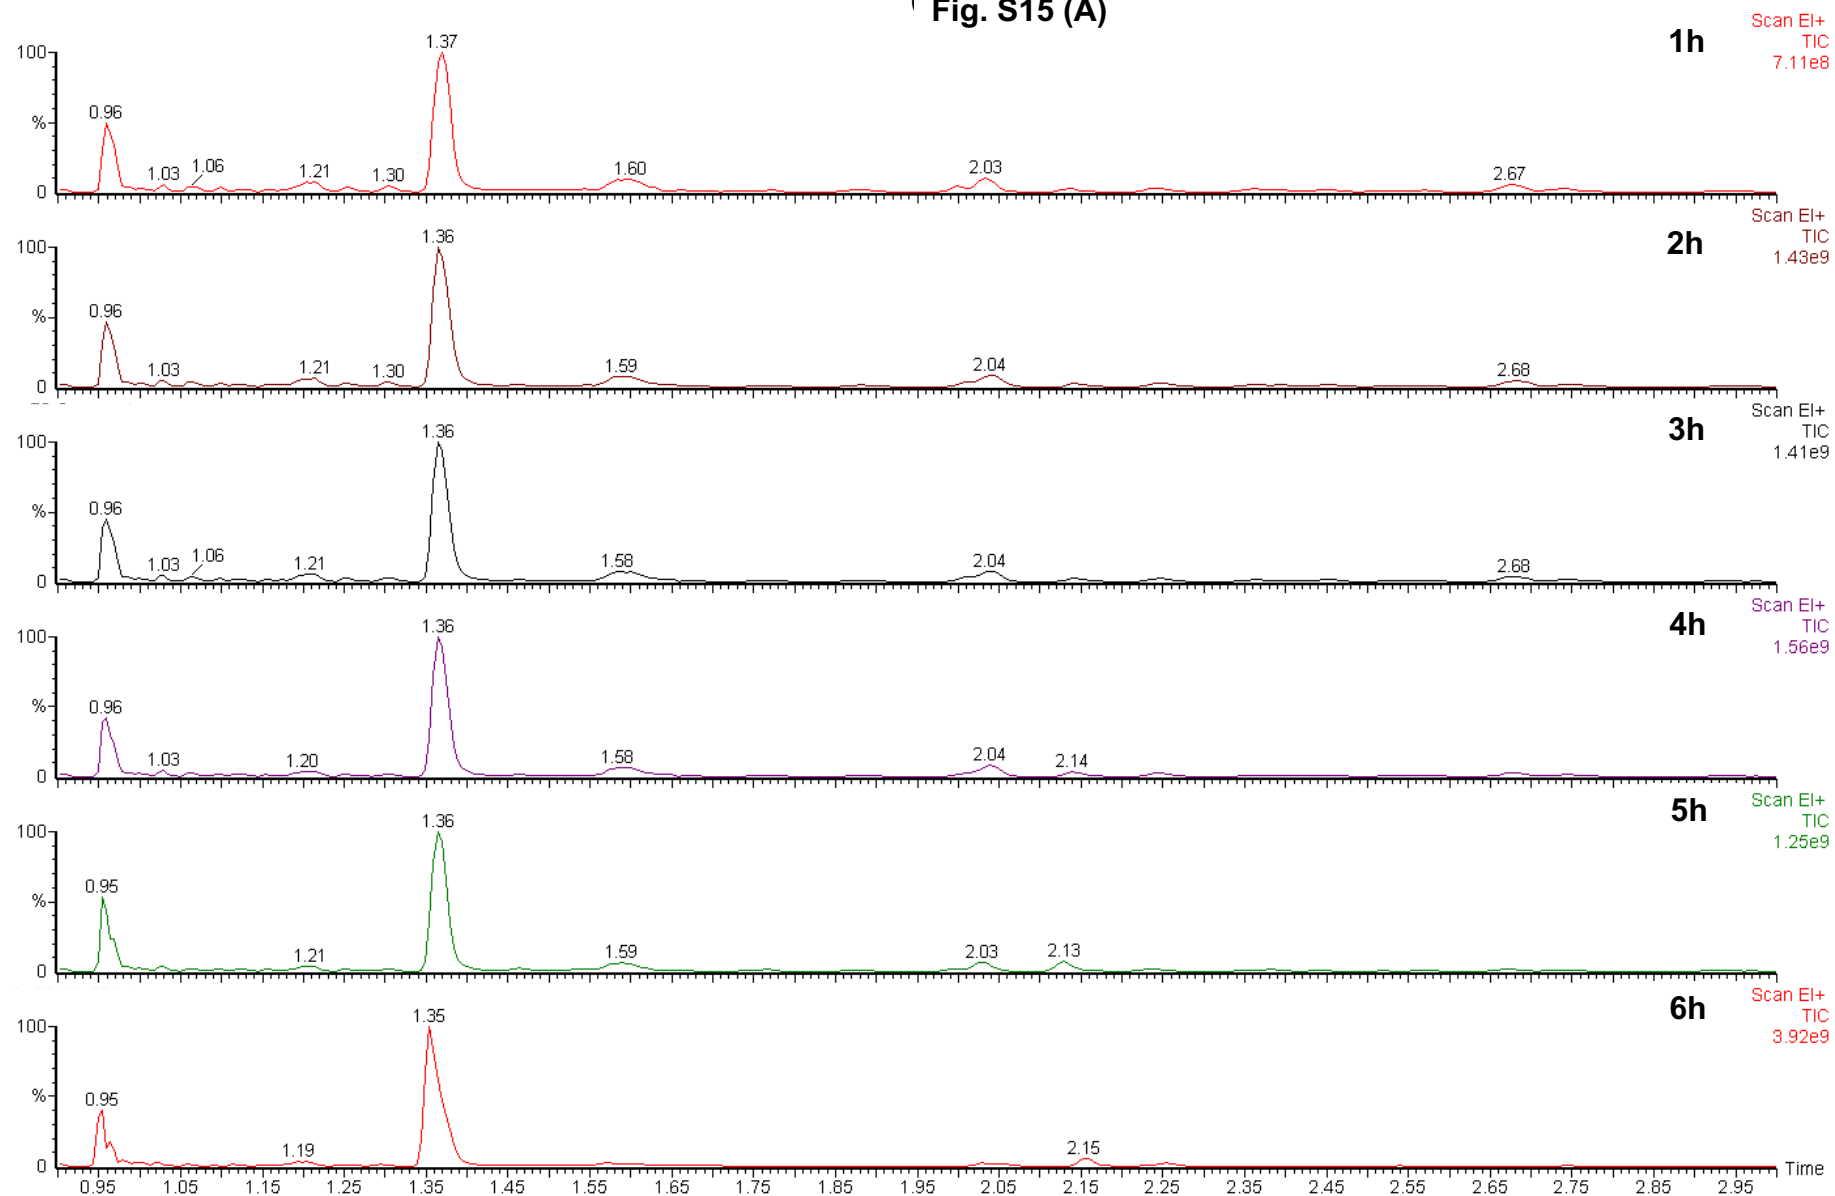

Fig. S15 (B)

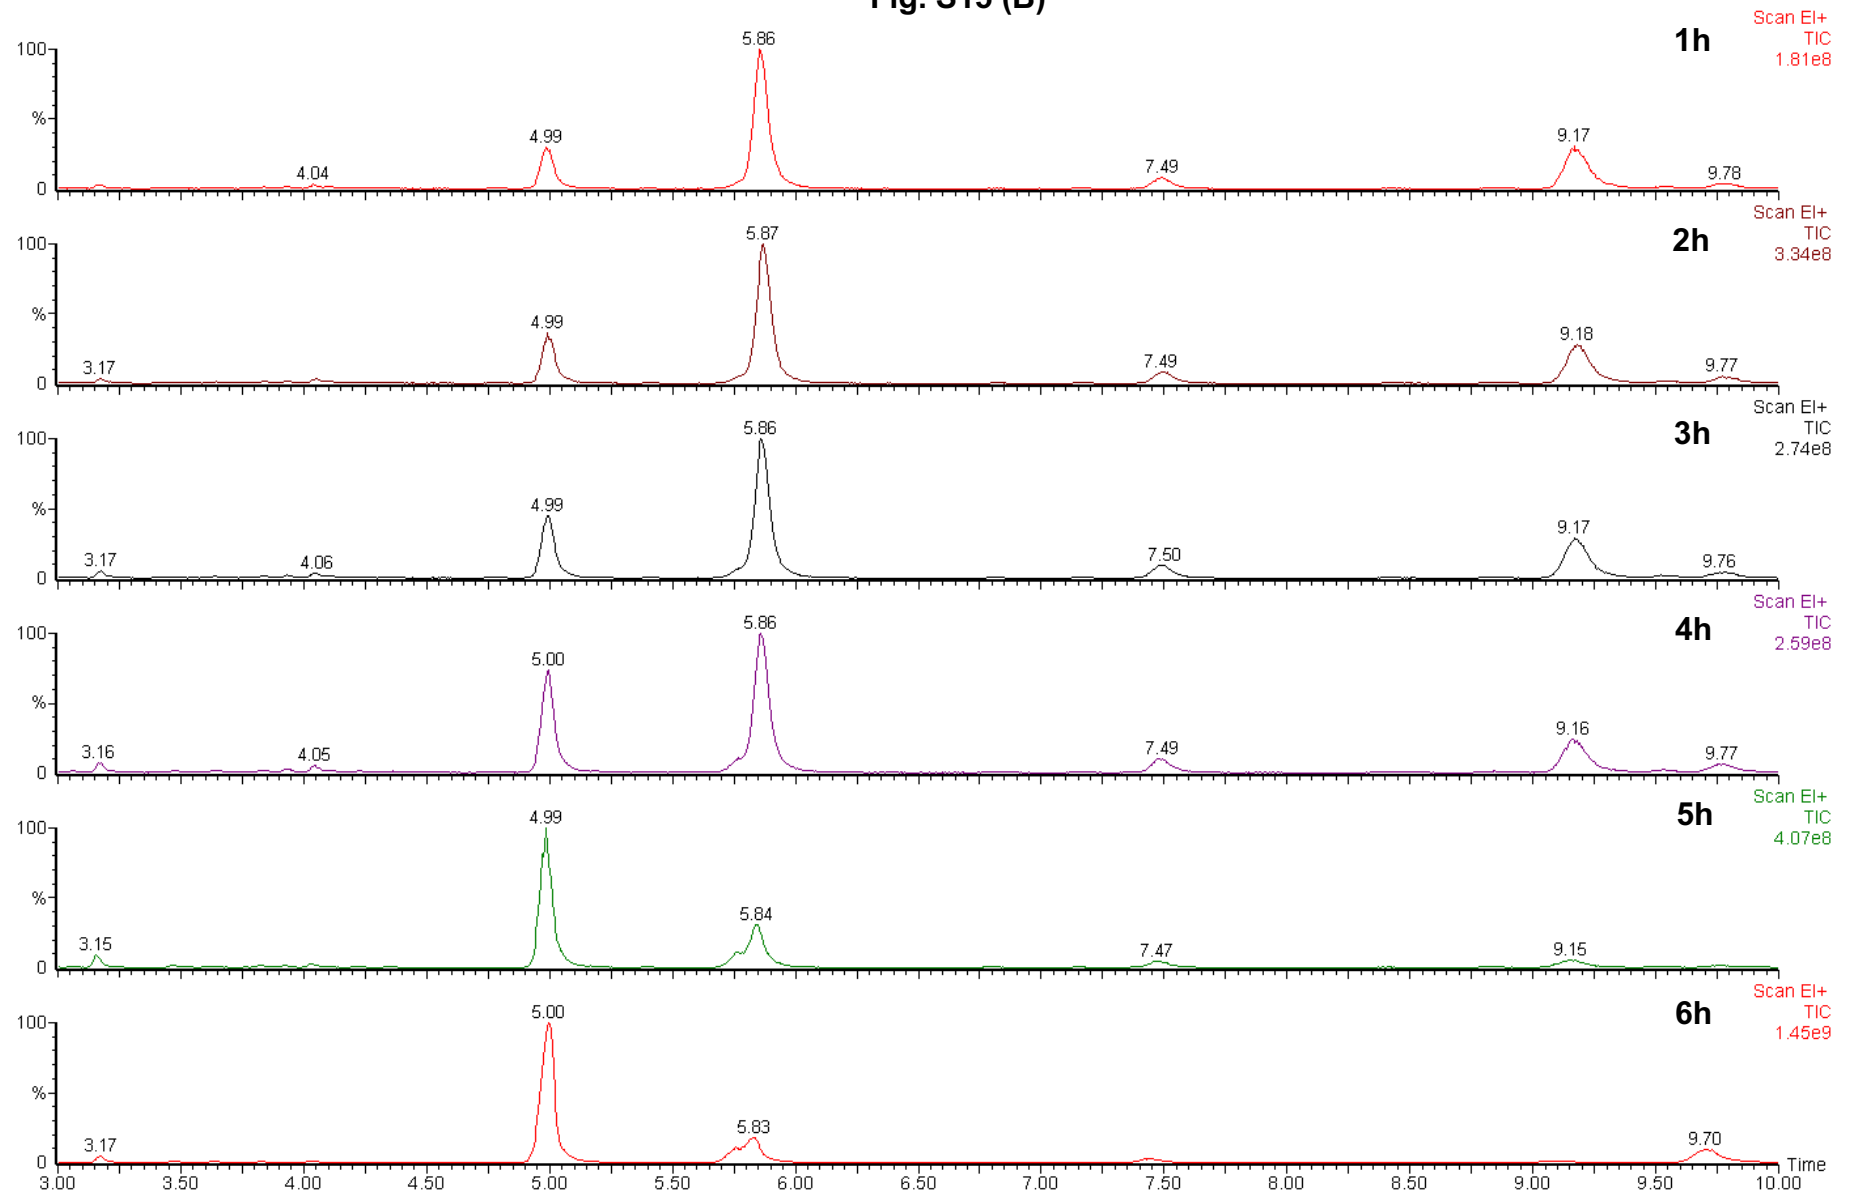



Fig. S15 (C)

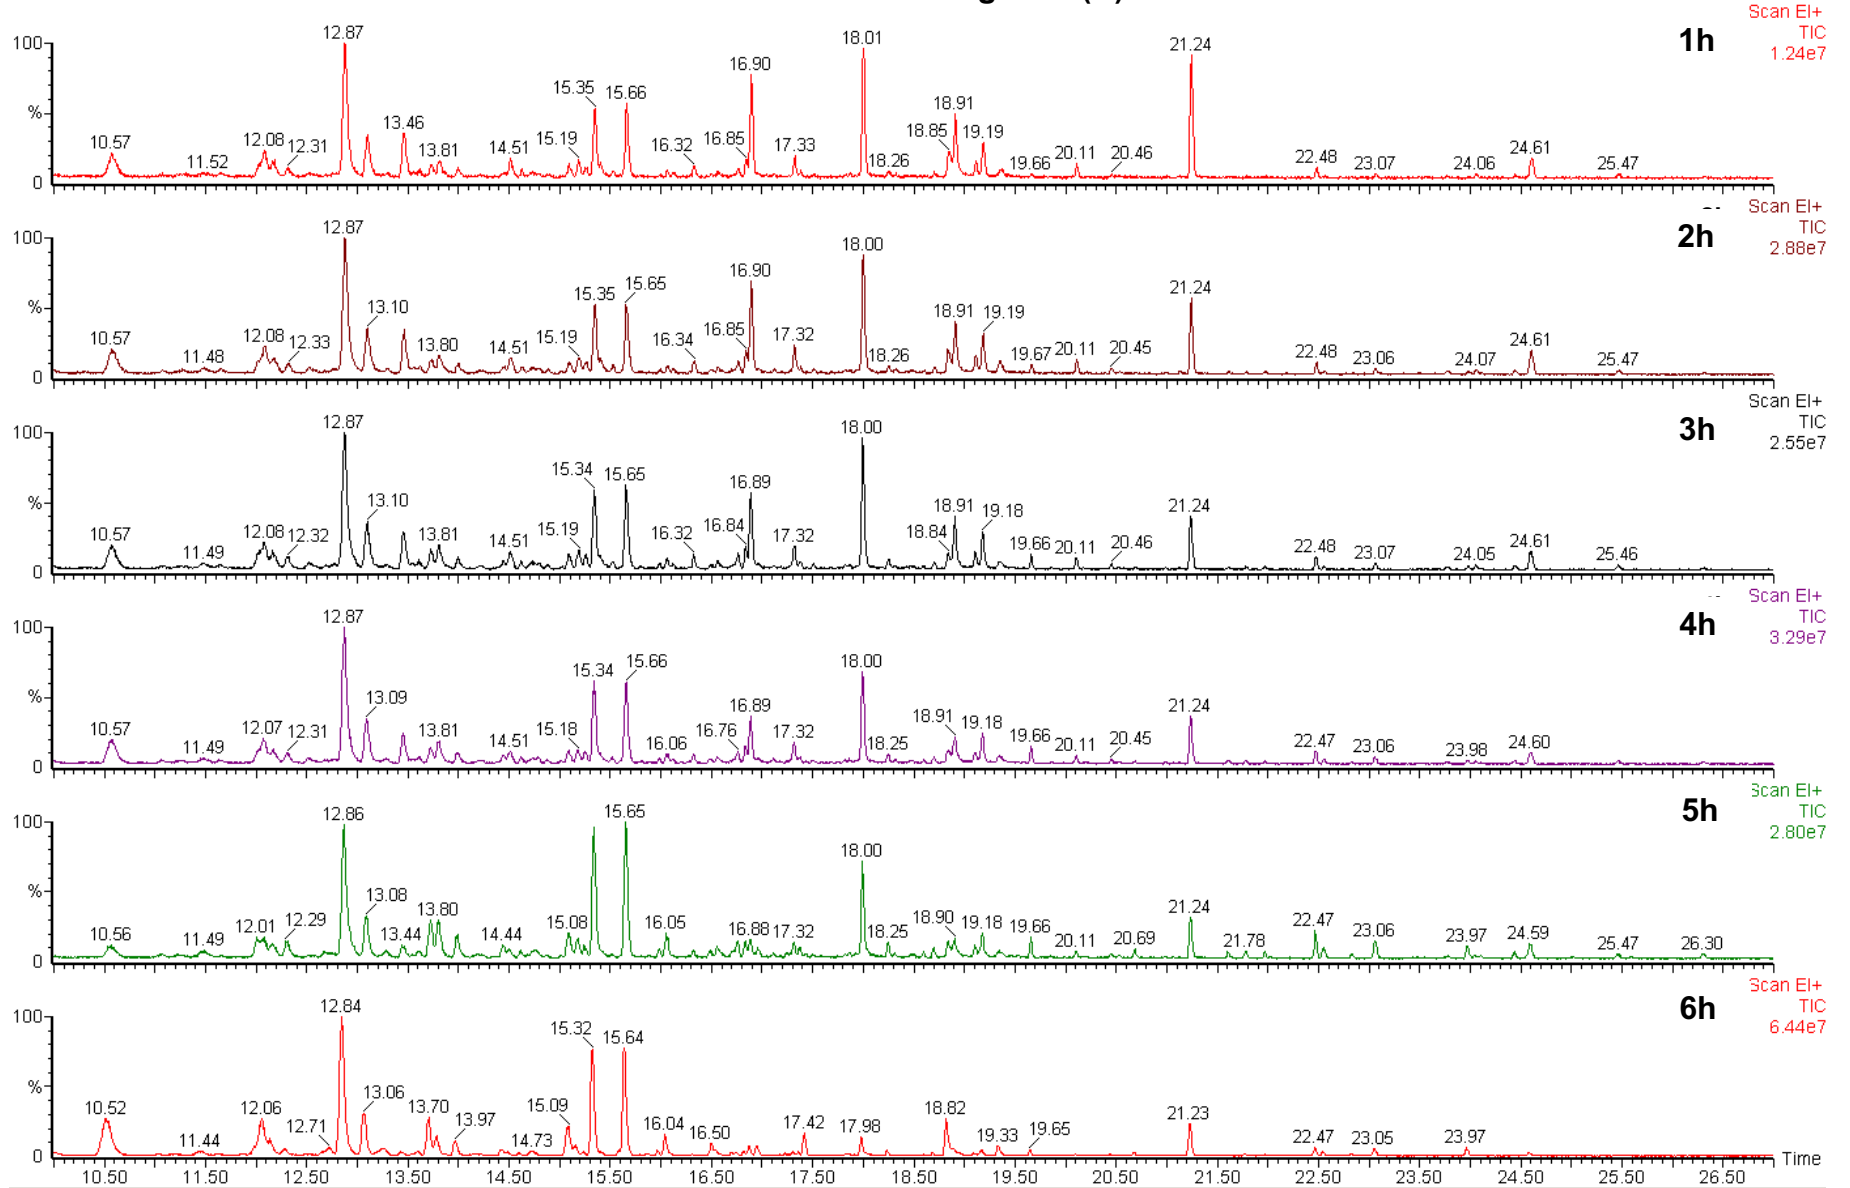

Fig. S16 (A)

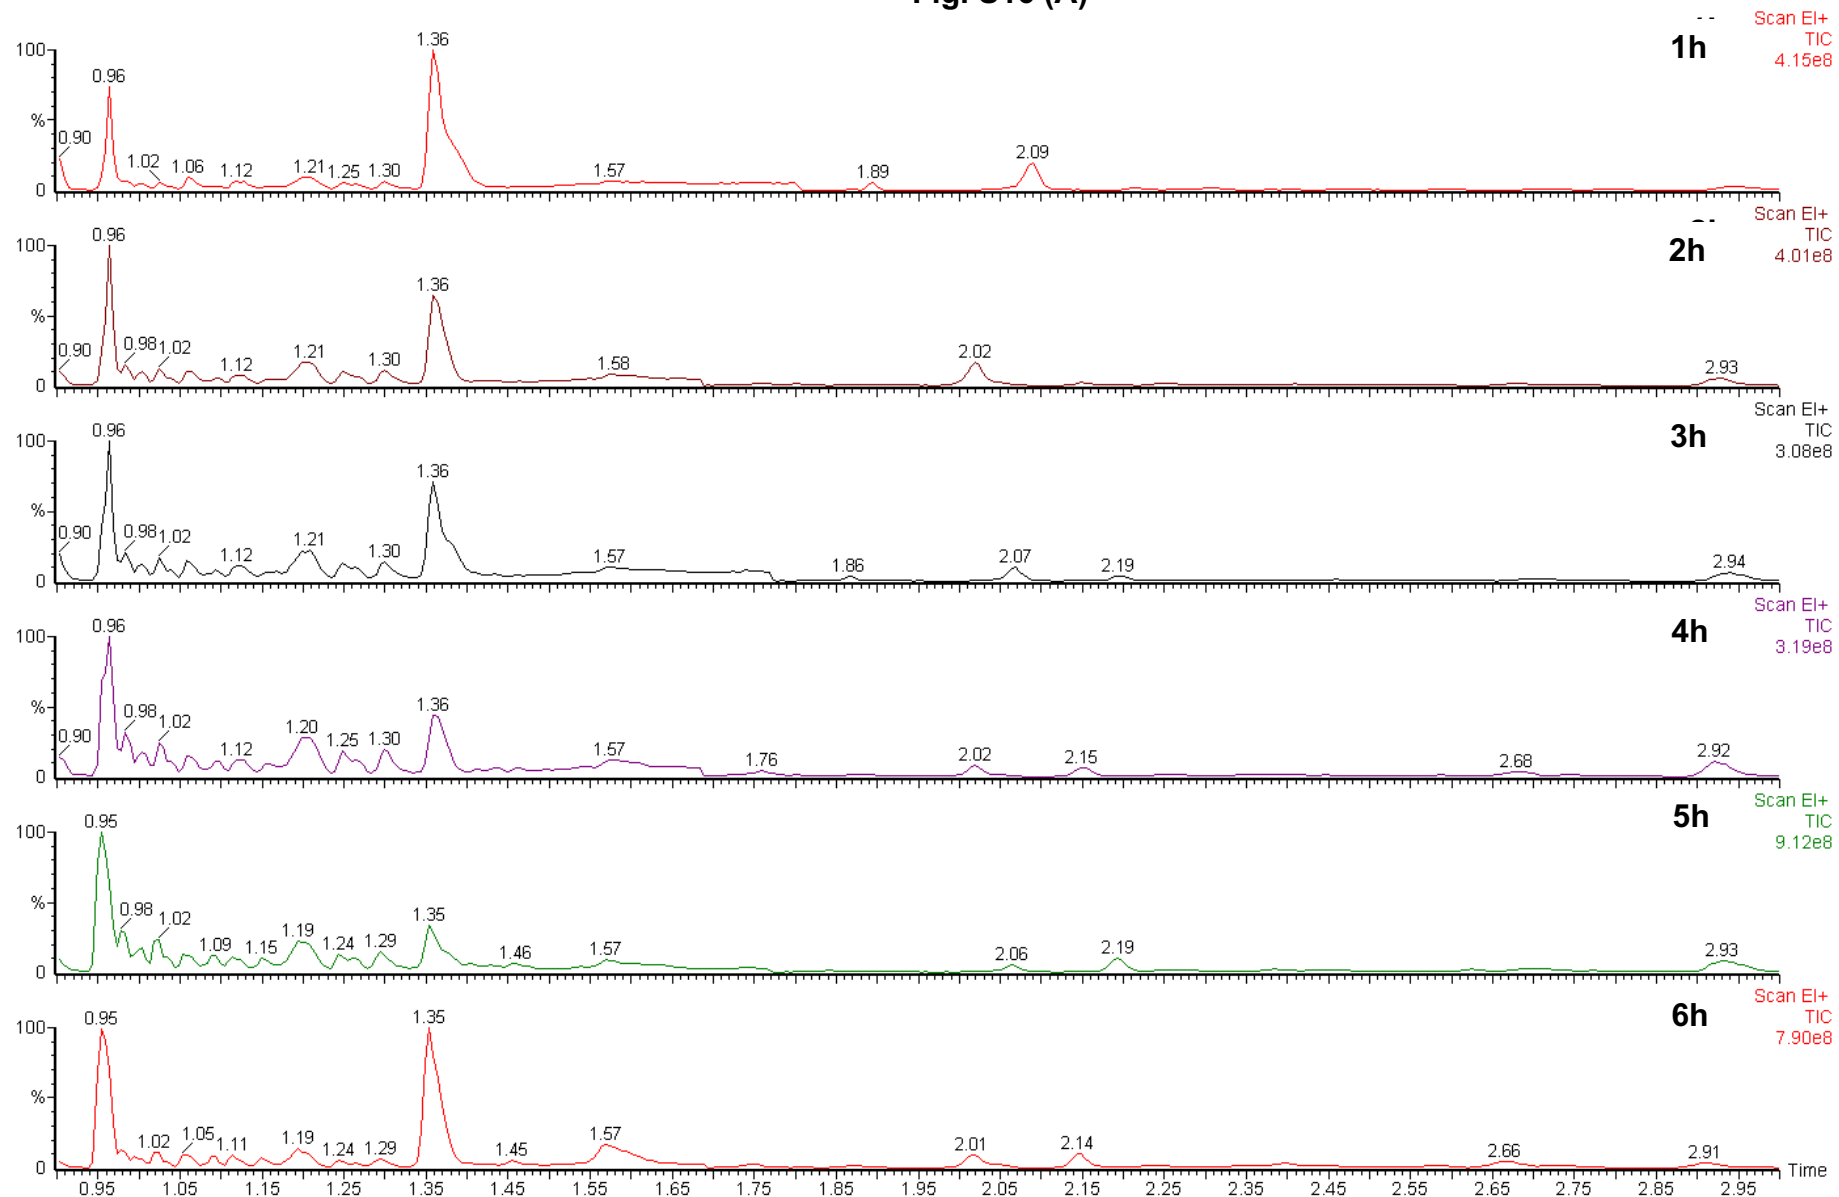

Fig. S16 (B)

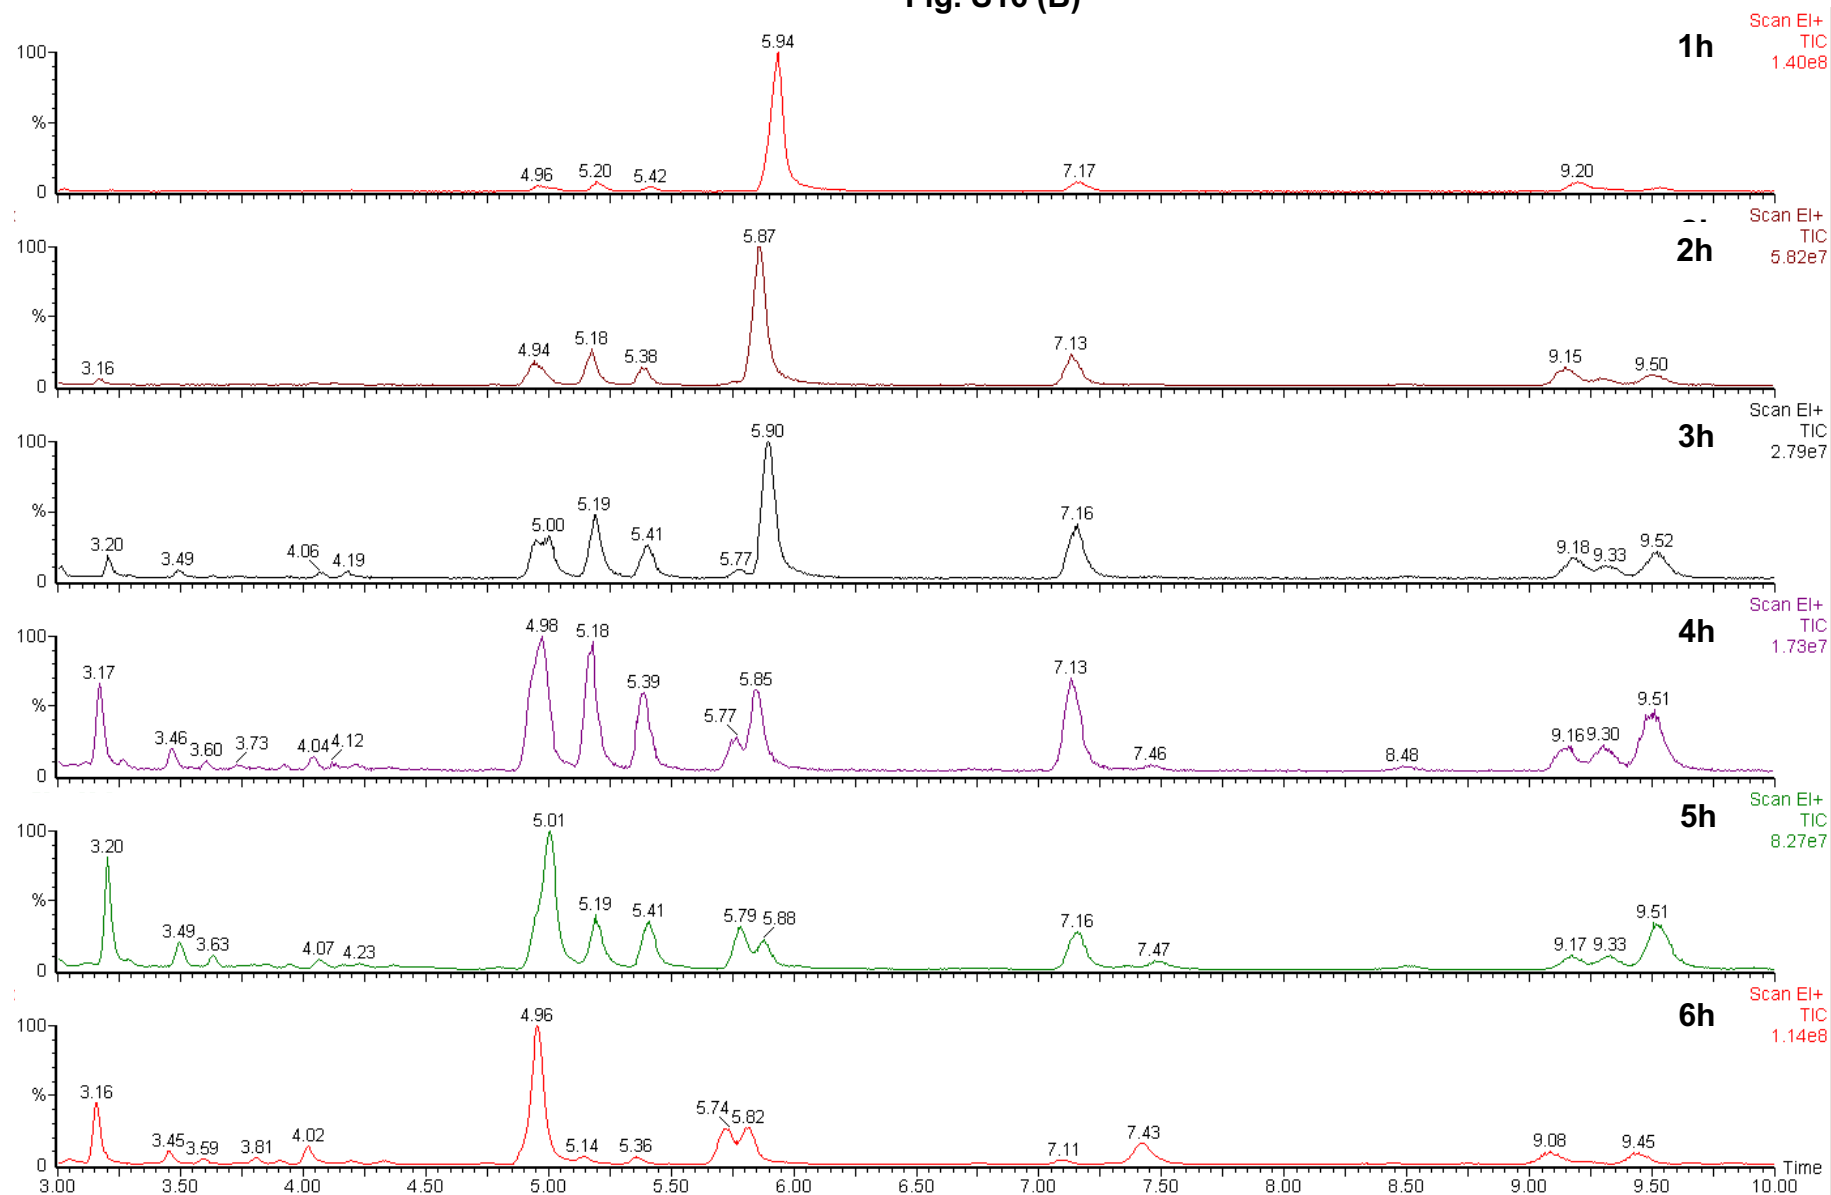

Fig. S16 (C)

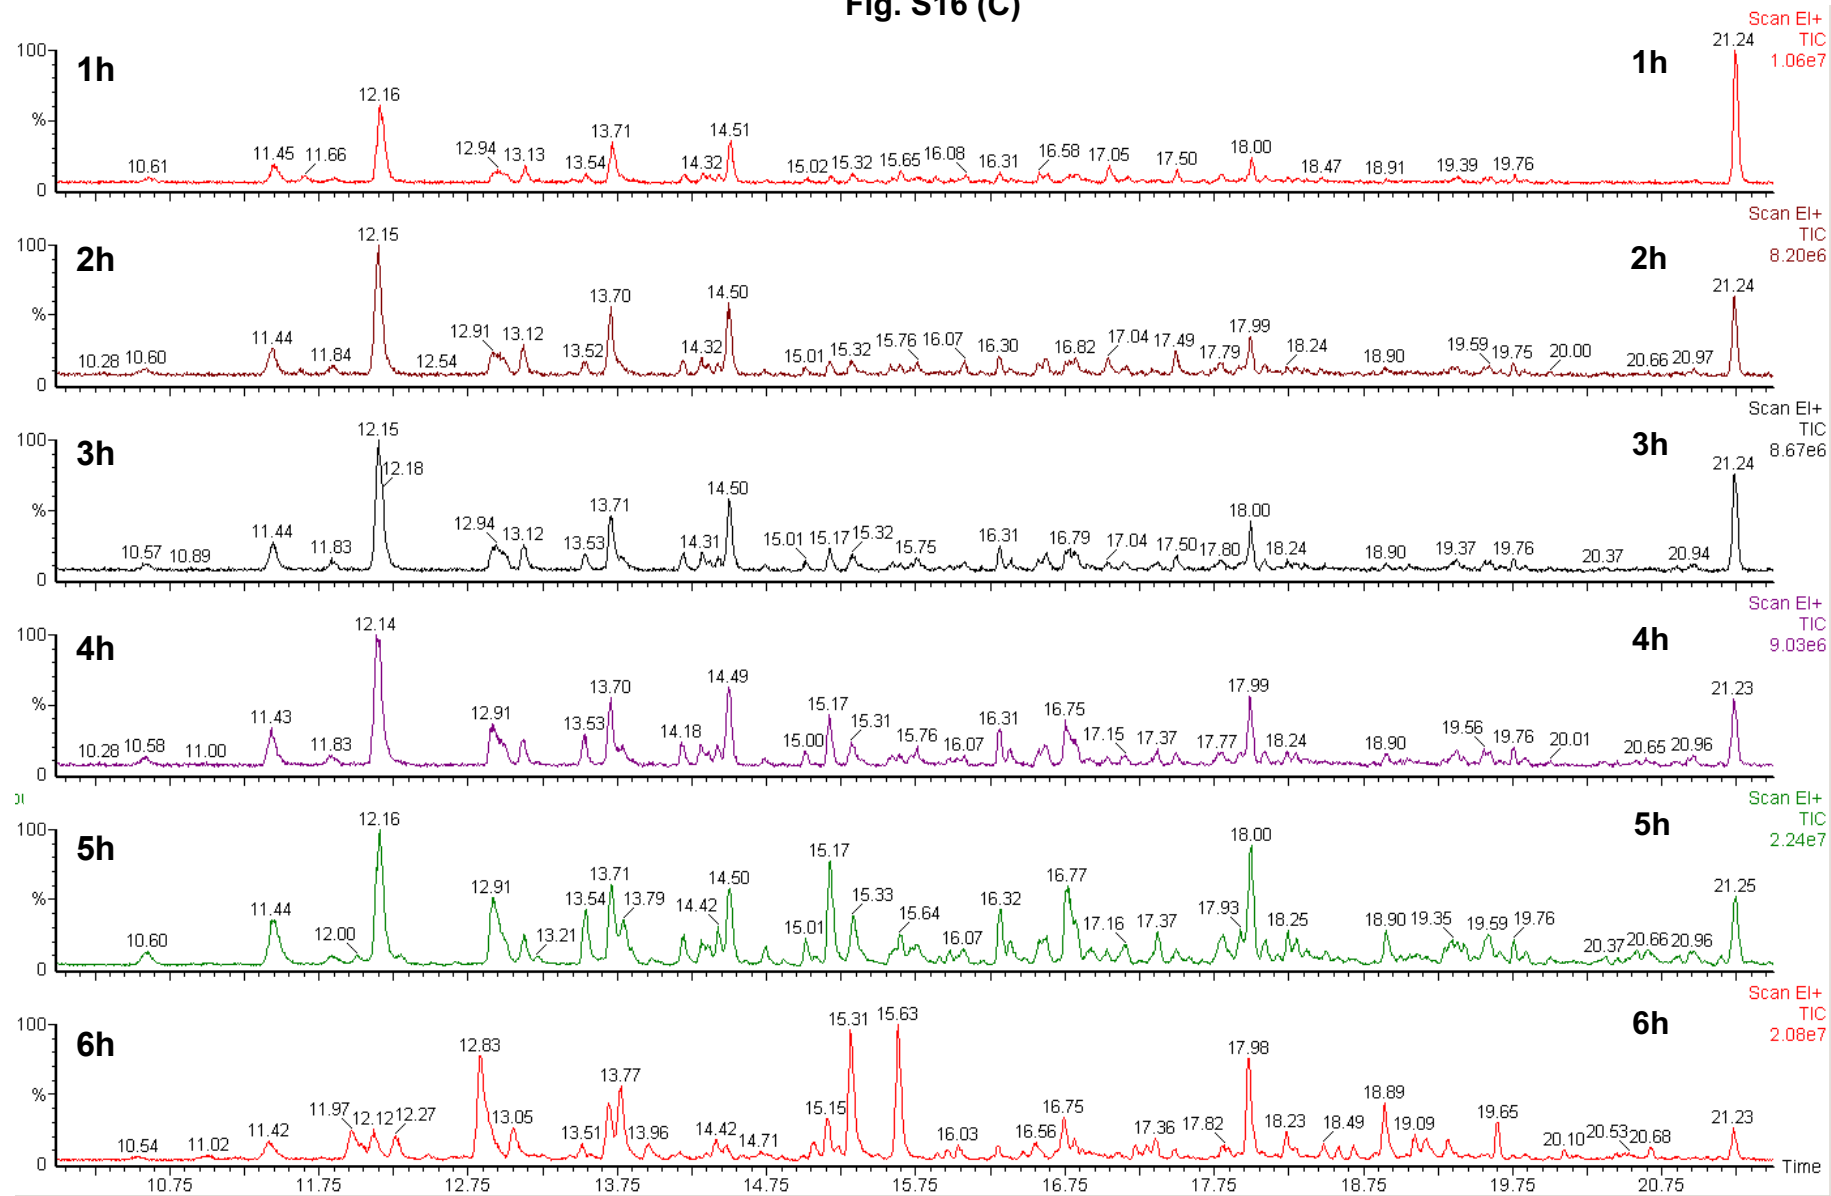

## 4.2 - Retention times for GC-MS total ion chromatograms

---

|       |                                  |       |                                         |
|-------|----------------------------------|-------|-----------------------------------------|
| 0.78  | 2-butene                         | 13.79 | 1-(1-methylethyl) cyclopentane          |
| 0.81  | 2-methyl-2-butene                | 13.80 | 2,3-dimethyl-2-cyclopenten-1-one        |
| 0.89  | heptane                          | 13.98 | vinyl cyclohexanecarboxylate            |
| 0.95  | 3-heptene                        | 14.20 | 4-ethyl-1,2-dimethyl-benzene            |
| 0.96  | 1-metoxi-butane                  | 14.50 | 1-ethyl-2,4-dimethyl-benzene            |
| 1.20  | 2-methyl-3-heptene               | 15.01 | 1-etenil-3-ethyl-benzene                |
| 1.36  | butyraldehyde                    | 15.08 | 3-isobutyl-5-methyl-2-hexanone          |
| 1.46  | 2-methyl-2,4-hexadiene           | 15.16 | 1,3,5-diethyl-benzene                   |
| 1.76  | benzene                          | 15.17 | 1,3-diethyl-5-methyl-benzene            |
| 2.01  | Isobutyl ethenyl ether           | 15.32 | 2,3,4-trimethyl-2-cyclopenten-1-one     |
| 2.04  | n-butyl ether                    | 15.33 | 3-(1-methylethyl)-cyclohexene           |
| 2.13  | 2-pentanone                      | 15.34 | 2,3,4-trimethyl-2-cyclopenten-1-one     |
| 2.24  | 1-methyl-cyclohexene             | 15.65 | 3,4-dimethyl-2-cyclohexen-1-one         |
| 2.25  | methyl butanoate                 | 15.73 | 1,4-diethyl-2-methyl-benzene            |
| 2.40  | 2-ethyl butyraldehyde            | 16.06 | 3-hepten-2-one                          |
| 2.67  | 2,5-dimethyl-1,3-hexadiene       | 16.32 | 1,3,5-triethyl-benzene                  |
| 2.92  | toluene                          | 16.51 | butyl-2-ethyl hexanoate                 |
| 3.16  | 3-hexanone                       | 16.89 | 2-ethyl-1-hexanol                       |
| 3.47  | 2-methyl-3-hexanone              | 16.96 | 5-ethyl-2,4-dimethyl-4-hepten-3-one     |
| 3.63  | 1-butoxy- <i>trans</i> -1-butene | 17.32 | 4-ethyl-4-methyl-2-cyclohexen-1-one     |
| 3.83  | hexanaldehyde                    | 17.43 | 4-undecanone                            |
| 4.03  | 2-methyl-2-butenaldehyde         | 17.78 | 2,2,5,5-tetramethyl-3-cyclopenten-1-one |
| 4.98  | 4-heptanone                      | 17.98 | 2,2,4,4-tetramethyl-3-cyclopenten-1-one |
| 5.19  | <i>p</i> -xylene                 | 18.83 | butanoic acid                           |
| 5.36  | 1,3-dimethyl-benzene             | 19.17 | 3,4-dimethyl-4-ethyl-2-cyclohexen-1-one |
| 5.41  | 1,3-dimethyl-benzene             | 19.33 | 2-methyl-butanoic acid                  |
| 5.74  | 3-methyl-4-heptanone             | 19.65 | 3-ethyl-benzaldehyde                    |
| 5.90  | 1-butanol                        | 21.96 | 3,5-dimethyl-phenol                     |
| 7.14  | <i>o</i> -xylene                 | 22.54 | 2-ethyl-5-methyl-phenol                 |
| 7.47  | 2-ethylhexanaldehyde             | 23.07 | 4-methyl-phenol                         |
| 9.11  | 2-methyl-1-butanol               | 23.98 | 2-ethyl-phenol                          |
| 9.45  | 1-ethyl-2-methyl-benzene         | 24.60 | 2,4-bis(1-methylethyl)-phenol           |
| 9.51  | 1-ethyl-2-methyl-benzene         |       |                                         |
| 9.76  | butyl-butyrate                   |       |                                         |
| 10.52 | butyl 2-methyl butanoate         |       |                                         |
| 11.46 | (1-methyl-ethyl)-benzene         |       |                                         |
| 12.00 | 2,6-dimethyl-cyclohexanone       |       |                                         |
| 12.16 | 1,2,3-trimethyl-benzene          |       |                                         |
| 12.87 | 2-ethyl-hexenaldehyde            |       |                                         |
| 12.92 | 1,3-diethyl-benzene              |       |                                         |
| 13.71 | 4-nonanone                       |       |                                         |

---

### 4.3 – Tables

**Table S3.** Reaction Products for 1-butanol (100%) at 550 °C.

| Products                            | Reaction Time / $\mu\text{mols}$ |         |        |         |         |         | Sum                  | Selectivity |
|-------------------------------------|----------------------------------|---------|--------|---------|---------|---------|----------------------|-------------|
|                                     | 30 min                           | 60 min  | 90 min | 120 min | 150 min | 180 min | ( $\mu\text{mols}$ ) | (%)         |
| 3-heptene                           | 302.5                            | 33491.3 | 2678.8 | 4149.1  | 2406.7  | 2301.3  | 45329.7              | 31.2        |
| butyraldehyde                       | 15415.5                          | 6981.6  | 3463.0 | 4878.1  | 4702.0  | 9374.9  | 44815.1              | 30.9        |
| 4-heptanone                         | 8054.3                           | 3981.4  | 1894.6 | 2788.0  | 1691.1  | 1850.0  | 20259.5              | 14.0        |
| 2-butene                            | 1469.5                           | 1272.0  | 739.0  | 1504.8  | 877.2   | 1339.5  | 7202.0               | 5.0         |
| butyl-butyrate                      | 4027.5                           | 1503.6  | 692.4  | 545.8   | 61.2    | 73.3    | 6903.8               | 4.8         |
| 2-ethyl-hexanaldehyde               | 673.9                            | 496.8   | 302.4  | 350.6   | 269.9   | 537.8   | 2631.5               | 1.8         |
| 2,3,4-trimethyl-2-cyclopenten-1-one | 769.2                            | 447.3   | 233.3  | 301.9   | 373.1   | 437.9   | 2562.8               | 1.8         |
| 3,4-dimethyl-2-cyclohexen-1-one     | 722.0                            | 413.6   | 208.1  | 261.1   | 324.0   | 409.8   | 2338.5               | 1.6         |
| 2,5-dimethyl-2,4-hexadiene          | 89.0                             | 89.5    | 96.9   | 171.5   | 442.6   | 1196.7  | 2086.1               | 1.4         |
| isobutyl ethenyl ether              | 499.8                            | 112.5   | 397.6  | 220.1   | 206.4   | 528.4   | 1964.9               | 1.4         |
| 2-ethyl-hexenaldehyde               | 887.1                            | 231.6   | 111.4  | 93.5    | 228.4   | 331.8   | 1883.8               | 1.3         |
| 2-pentanone                         | 539.6                            | 358.2   | 191.2  | 327.6   | 183.0   | 197.7   | 1797.4               | 1.2         |
| butyric acid                        | 405.3                            | 394.4   | 208.3  | 378.8   | 31.5    | 28.0    | 1446.4               | 1.0         |
| Minors (7) < 1.0%*                  | 733.5                            | 504.7   | 384.2  | 565.3   | 428.7   | 1238.7  | 3855.1               | 2.7         |

  

| Products by Chemical Class | Reaction Time / $\mu\text{mols}$ |         |        |         |         |         | Sum                  | Selectivity |
|----------------------------|----------------------------------|---------|--------|---------|---------|---------|----------------------|-------------|
|                            | 30 min                           | 60 min  | 90 min | 120 min | 150 min | 180 min | ( $\mu\text{mols}$ ) | (%)         |
| Alkenes                    | 1963.8                           | 34933.4 | 3592.8 | 5982.1  | 3821.3  | 5457.7  | 55751.0              | 38.4        |
| Aldehydes                  | 17033.0                          | 7752.2  | 3908.2 | 5363.8  | 5230.5  | 10280.8 | 49568.5              | 34.2        |
| Ketones                    | 8755.3                           | 4457.5  | 2159.9 | 3227.2  | 1946.2  | 2151.7  | 22697.6              | 15.6        |
| Esters                     | 4027.5                           | 413.6   | 208.1  | 261.1   | 324.0   | 409.8   | 5644.0               | 3.9         |
| Cyclic (C5)                | 588.8                            | 202.0   | 494.5  | 391.6   | 649.0   | 1725.1  | 4051.0               | 2.8         |
| Ethers                     | 698.0                            | 175.3   | 420.6  | 253.2   | 226.8   | 588.8   | 2362.7               | 1.6         |
| Carboxylic Acids           | 539.6                            | 358.2   | 191.2  | 327.6   | 183.0   | 197.7   | 1797.4               | 1.2         |
| Alcohols                   | 214.9                            | 201.2   | 177.8  | 222.4   | 211.3   | 417.7   | 1445.2               | 1.0         |

  

| 1-butanol Consumption and Gaseous Products |         |         |         |         |         |         | Yield (%) |
|--------------------------------------------|---------|---------|---------|---------|---------|---------|-----------|
| 1-butanol (total, $\mu\text{mols}$ )       |         |         |         |         |         |         | 393414.0  |
| 1-butanol (not reacted, $\mu\text{mols}$ ) | 12596.9 | 8868.4  | 5816.7  | 6935.7  | 2775.1  | 8301.4  | 45294.3   |
| 1-butanol consumption (%)                  | 80.8    | 86.5    | 91.1    | 89.4    | 95.8    | 87.3    | 88.5      |
| Condensed Products ( $\mu\text{mols}$ )    | 34589.0 | 50278.5 | 11601.4 | 16536.2 | 12225.8 | 19845.7 | 145076.6  |
| Gaseous Products ( $\mu\text{mols}$ )      |         |         |         |         |         |         | 203043.1  |

\* Heptene, 3-hepten-2-ol, metacrolein, 3-hexanone, 1-butoxy-trans-1-butene, hexanal, 3-hepten-2-one, 2-ethyl-1-hexanol, butyl-2-ethylhexanoate, 5-ethyl-2,4-dimethyl-4-hepten-3-one, 4-undecanone.

**Table S4.** Reaction Products for 1-butanol (100%) at 600 °C.

| Products                             | Reaction Time / $\mu\text{mols}$ |        |        |         |         |         | Sum<br>( $\mu\text{mols}$ ) | Selectivity<br>(%) |
|--------------------------------------|----------------------------------|--------|--------|---------|---------|---------|-----------------------------|--------------------|
|                                      | 30 min                           | 60 min | 90 min | 120 min | 150 min | 180 min |                             |                    |
| <b>3-heptene</b>                     | 3855.9                           | 2582.0 | 823.5  | 390.3   | 781.0   | 602.8   | 9035.4                      | 19.1               |
| 4-heptanone                          | 2819.3                           | 1532.2 | 446.5  | 277.4   | 414.5   | 361.3   | 5851.3                      | 12.4               |
| butyraldehyde                        | 1525.9                           | 2042.4 | 269.3  | 171.7   | 705.7   | 788.4   | 5503.5                      | 11.6               |
| <b>2-methyl-3-heptene</b>            | 732.7                            | 940.6  | 260.8  | 219.6   | 620.8   | 629.9   | 3404.4                      | 7.2                |
| toluene                              | 549.8                            | 528.3  | 302.8  | 318.8   | 495.0   | 531.2   | 2725.9                      | 5.8                |
| o-xylene                             | 371.9                            | 499.6  | 246.4  | 263.2   | 536.7   | 526.6   | 2444.3                      | 5.2                |
| n-butyl ether                        | 500.5                            | 574.9  | 76.4   | 87.8    | 429.4   | 607.8   | 2276.8                      | 4.8                |
| p-xylene                             | 411.5                            | 295.6  | 143.5  | 199.6   | 439.5   | 464.1   | 1953.7                      | 4.1                |
| <b>2-butene</b>                      | 805.6                            | 42.8   | 188.1  | 58.1    | 479.8   | 76.3    | 1650.7                      | 3.5                |
| heptane                              | 0.0                              | 240.9  | 240.6  | 228.7   | 337.8   | 347.6   | 1395.5                      | 3.0                |
| benzene                              | 460.6                            | 205.7  | 96.5   | 62.3    | 98.0    | 190.9   | 1114.0                      | 2.4                |
| 2-pentanone                          | 650.4                            | 245.8  | 68.6   | 37.9    | 54.3    | 38.2    | 1095.2                      | 2.3                |
| <b>2-methyl-2,4-hexadiene</b>        | 314.9                            | 393.6  | 77.6   | 49.4    | 96.2    | 118.6   | 1050.3                      | 2.2                |
| <b>1-methyl-cyclohexene</b>          | 388.5                            | 254.1  | 52.3   | 35.0    | 92.0    | 56.2    | 878.1                       | 1.9                |
| <b>2,3-dimethyl-2,4-hexadiene</b>    | 298.1                            | 237.0  | 29.2   | 22.0    | 86.1    | 75.1    | 747.5                       | 1.6                |
| <b>1,3-dimethyl-benzene</b>          | 117.0                            | 112.1  | 84.6   | 96.5    | 127.5   | 155.0   | 692.7                       | 1.5                |
| <b>1-methylethyl-benzene</b>         | 161.6                            | 169.5  | 69.2   | 60.5    | 81.0    | 68.6    | 610.5                       | 1.3                |
| <b>1-ethyl-2-methyl-benzene</b>      | 110.0                            | 125.0  | 84.8   | 80.2    | 92.2    | 86.1    | 578.3                       | 1.2                |
| <b>3-(1-methylethyl)-cyclohexene</b> | 243.0                            | 146.9  | 23.4   | 18.2    | 31.5    | 24.2    | 487.3                       | 1.0                |
| <b>1,2,3-trimethyl-benzene</b>       | 66.3                             | 73.5   | 50.2   | 75.1    | 95.4    | 97.0    | 457.5                       | 1.0                |
| Minors (15) < 1.0%*                  | 1251.7                           | 923.1  | 329.3  | 248.7   | 319.9   | 261.9   | 3334.6                      | 7.1                |

  

| Products by Chemical Class | Reaction Time / $\mu\text{mols}$ |        |        |         |         |         | Sum<br>( $\mu\text{mols}$ ) | Selectivity<br>(%) |
|----------------------------|----------------------------------|--------|--------|---------|---------|---------|-----------------------------|--------------------|
|                            | 30 min                           | 60 min | 90 min | 120 min | 150 min | 180 min |                             |                    |
| <b>Alkenes</b>             | 6815.7                           | 4717.8 | 1466.1 | 802.9   | 2211.1  | 1604.0  | 17617.5                     | 37.3               |
| <b>Aromatics (C6)</b>      | 2749.9                           | 2382.3 | 1251.1 | 1318.4  | 2147.5  | 2270.5  | 12119.6                     | 25.6               |
| Ketones                    | 3786.3                           | 1979.1 | 609.9  | 356.3   | 510.6   | 428.0   | 7670.2                      | 16.2               |
| Aldehydes                  | 1619.3                           | 2144.2 | 285.1  | 178.9   | 737.7   | 815.5   | 5780.8                      | 12.2               |
| Ethers                     | 500.5                            | 574.9  | 76.4   | 87.8    | 429.4   | 607.8   | 2276.8                      | 4.8                |
| Alkanes                    | 0.0                              | 240.9  | 240.6  | 228.7   | 337.8   | 347.6   | 1395.5                      | 3.0                |
| Cyclic (C5)                | 163.5                            | 126.4  | 34.5   | 28.1    | 40.3    | 34.3    | 427.1                       | 0.9                |

  

| 1-butanol Consumption and Gaseous Products |         |         |        |        |        |        | Yield (%) |      |
|--------------------------------------------|---------|---------|--------|--------|--------|--------|-----------|------|
| 1-butanol (total, $\mu\text{mols}$ )       |         |         |        |        |        |        | 393414.0  |      |
| 1-butanol (not reacted, $\mu\text{mols}$ ) | 0.0     | 238.7   | 72.8   | 80.4   | 487.4  | 763.4  | 1642.7    |      |
| 1-butanol consumption (%)                  | 100.0   | 99.6    | 99.9   | 99.9   | 99.3   | 98.8   | 99.6      |      |
| Condensed Products ( $\mu\text{mols}$ )    | 15635.1 | 12165.6 | 3963.6 | 3001.0 | 6414.4 | 6107.7 | 47287.5   | 12.1 |
| Gaseous Products ( $\mu\text{mols}$ )      |         |         |        |        |        |        | 344483.8  | 87.9 |

\* 3-hexanone, 2-ethylhexanal, 2,6-dimethylcyclohexanone, 1,3-diethylbenzene, 4-nonanone, 1- (1-methylethyl) cyclopentane, 4-ethyl-1,2-dimethylbenzene, 1-ethyl-2,4-dimethylbenzene, 1-ethenyl-3-ethylbenzene, 1,3-diethyl-5-methylbenzene, 3,4-dimethyl-2-cyclohexen-1-one, 1,4-diethyl-2-methylbenzene, 1,3,5-triethylbenzene, 4-methylphenol, 2-ethylphenol.

**Table S5.** Reaction Products for 1-butanol : methanol 7:3 (v/v) at 550 °C.

| Products                   | Reaction Time / $\mu\text{mols}$ |        |        |         |         |         | Sum<br>( $\mu\text{mols}$ ) | Selectivity<br>(%) |
|----------------------------|----------------------------------|--------|--------|---------|---------|---------|-----------------------------|--------------------|
|                            | 30 min                           | 60 min | 90 min | 120 min | 150 min | 180 min |                             |                    |
| butyraldehyde              | 9995.4                           | 6714.5 | 8728.1 | 10300.5 | 6948.1  | 4821.5  | 47508.0                     | 38.5               |
| 1-methoxy-butane           | 5012.7                           | 4808.8 | 5574.6 | 7122.7  | 4464.8  | 3427.2  | 30410.8                     | 24.7               |
| 4-heptanone                | 5801.6                           | 3319.3 | 1714.9 | 1497.2  | 863.7   | 573.9   | 13770.4                     | 11.2               |
| 2-methyl-1-butanol         | 242.9                            | 658.4  | 1648.1 | 2751.4  | 2059.3  | 1650.5  | 9010.7                      | 7.3                |
| n-butyl ether              | 470.4                            | 667.3  | 1197.7 | 1320.5  | 1031.6  | 795.6   | 5483.1                      | 4.4                |
| n-butyl butanoate          | 965.9                            | 119.6  | 265.9  | 228.5   | 223.3   | 113.9   | 1916.9                      | 1.6                |
| 2-ethyl-hexanal            | 206.1                            | 235.4  | 328.2  | 427.1   | 284.4   | 198.0   | 1679.2                      | 1.4                |
| 2-pentanone                | 391.1                            | 429.4  | 248.4  | 256.5   | 138.2   | 97.7    | 1561.3                      | 1.3                |
| 2,3-dimethyl-2,4-hexadiene | 33.7                             | 99.7   | 228.1  | 373.1   | 279.7   | 232.3   | 1246.6                      | 1.0                |
| Minors (27) < 1.0%*        | 1720.2                           | 2095   | 2086.4 | 2312.3  | 1566.3  | 944.4   | 10724.4                     | 8.9                |

| Products by Chemical Class | Reaction Time / $\mu\text{mols}$ |        |        |         |         |         | Sum<br>( $\mu\text{mols}$ ) | Selectivity<br>(%) |
|----------------------------|----------------------------------|--------|--------|---------|---------|---------|-----------------------------|--------------------|
|                            | 30 min                           | 60 min | 90 min | 120 min | 150 min | 180 min |                             |                    |
| Aldehydes                  | 10551.7                          | 7411.6 | 9598.4 | 11348.7 | 7646.9  | 5278.6  | 51836.0                     | 42.0               |
| Ethers                     | 5542.3                           | 5514.8 | 6838.1 | 8508.8  | 5536.9  | 4222.8  | 36163.6                     | 29.3               |
| Ketones                    | 6461.1                           | 4059.3 | 2110.2 | 1908.8  | 1081.2  | 724.5   | 16345.2                     | 13.3               |
| Alcohols                   | 250.8                            | 676.3  | 1699.1 | 2842.5  | 2134.0  | 1703.1  | 9305.8                      | 7.5                |
| Esters                     | 1280.9                           | 262.7  | 558.6  | 546.8   | 467.5   | 282.5   | 3399.0                      | 2.8                |
| Cyclic (C5)                | 329.6                            | 604.1  | 548.6  | 616.7   | 389.8   | 247.2   | 2736.1                      | 2.2                |
| Aromatics (C6)             | 313.7                            | 486.8  | 401.6  | 403.6   | 277.3   | 142.0   | 2024.9                      | 1.6                |
| Alkenes                    | 33.7                             | 99.7   | 228.1  | 373.1   | 279.7   | 232.3   | 1246.6                      | 1.0                |
| Carboxylic Acids           | 76.3                             | 31.9   | 37.6   | 40.6    | 46.3    | 21.8    | 254.4                       | 0.2                |

| 1-butanol Consumption, Condensed and Gaseous Products |         |         |         |         |         |         | Yield (%) |      |
|-------------------------------------------------------|---------|---------|---------|---------|---------|---------|-----------|------|
| 1-butanol (total, $\mu\text{mols}$ )                  |         |         |         |         |         |         | 275388.0  |      |
| 1-butanol (not reacted, $\mu\text{mols}$ )            | 4202.4  | 5771.7  | 9797.2  | 13057.3 | 9854.6  | 7736.6  | 50419.8   |      |
| 1-butanol consumption (%)                             | 90.8    | 87.4    | 78.7    | 71.6    | 78.5    | 83.1    | 81.7      |      |
| Condensed Products ( $\mu\text{mols}$ )               | 24840.0 | 19147.4 | 22020.4 | 26589.8 | 17859.4 | 12855.0 | 123312.0  | 54.9 |
| Gaseous Products ( $\mu\text{mols}$ )                 |         |         |         |         |         |         | 101656.2  | 45.1 |

\* Methyl butanoate, 2-ethyl butanal, 3-hexanone, 2-methyl-3-hexanone, 1-butoxy-trans-1-butene, hexanal, 2-methyl-2-butanal, butyl 2-methylbutanoate, 2-ethyl-2-hexenal, 2-ethylhexenal, 4-nonanone, 2,3-dimethyl-2-cyclopenten-1-one, vinyl cyclohexanecarboxylate, 3-isobutyl-5-methyl-2-hexanone, 2,3,4-trimethyl-2-cyclopenten-1-one, 3,4-dimethyl-2-cyclohexen-1-one, 2-ethylhexanol, 4-ethyl-4-methyl-2-cyclohexen-1-one, butanoic acid, 3,4-dimethyl-4-ethyl-2-cyclohexen-1-one, 2-methylbutanoic acid, 3-ethylbenzaldehyde, 2-ethyl-5-methylphenol, 4-methylphenol, 2-ethylphenol, 2,4-bis(1-methylethyl) phenol, 2,2,4,4-tetramethyl-3-cyclopenten-1-one.



**Table S6.** Reaction Products for 1-butanol : methanol 7:3 (v/v) at 600 °C.

| Products                 | Reaction Time / $\mu\text{mols}$ |        |        |         |         |         | Sum<br>( $\mu\text{mols}$ ) | Selectivity<br>(%) |
|--------------------------|----------------------------------|--------|--------|---------|---------|---------|-----------------------------|--------------------|
|                          | 30 min                           | 60 min | 90 min | 120 min | 150 min | 180 min |                             |                    |
| 1-methoxy butane         | 11695.0                          | 6962.9 | 4049.4 | 2101.9  | 4158.0  | 1083.6  | 30050.8                     | 30.1               |
| 2-methyl-2-butene        | 8496.9                           | 6604.8 | 5663.4 | 2320.6  | 3982.5  | 550.8   | 27618.9                     | 27.7               |
| butyraldehyde            | 7462.8                           | 1266.7 | 1014.3 | 1216.1  | 2489.2  | 1815.0  | 15264.1                     | 15.3               |
| 4-heptanone              | 1875.9                           | 729.8  | 259.9  | 104.8   | 209.6   | 40.5    | 3220.5                      | 3.2                |
| n-butyl ether            | 1034.8                           | 216.6  | 233.3  | 178.9   | 752.7   | 333.0   | 2749.2                      | 2.8                |
| toluene                  | 543.4                            | 798.5  | 548.6  | 235.2   | 447.7   | 102.4   | 2675.8                      | 2.7                |
| o-xylene                 | 126.3                            | 401.7  | 348.6  | 226.2   | 492.6   | 167.7   | 1763.2                      | 1.8                |
| p-xylene                 | 221.2                            | 438.3  | 312.3  | 176.0   | 389.5   | 0.1     | 1537.4                      | 1.5                |
| 1-ethyl-3-methyl-benzene | 124.5                            | 574.1  | 286.3  | 132.2   | 246.0   | 71.6    | 1434.7                      | 1.4                |
| 1,3-dimethyl-benzene     | 207.0                            | 435.1  | 224.5  | 102.4   | 282.7   | 106.7   | 1358.4                      | 1.4                |
| 2-methyl-1-butanol       | 523.0                            | 143.2  | 98.7   | 84.9    | 299.9   | 148.4   | 1298.0                      | 1.3                |
| 2-pentanone              | 571.8                            | 273.0  | 134.8  | 46.1    | 77.9    | 21.3    | 1125.0                      | 1.1                |
| benzene                  | 371.7                            | 474.8  | 218.3  | 0.0     | 0.0     | 0.0     | 1064.8                      | 1.1                |
| Minors (16) < 1.0%*      | 4458.6                           | 2002.5 | 854.1  | 389.7   | 724.5   | 157.1   | 8586.6                      | 8.6                |

| Products by Chemical Class | Reaction Time / $\mu\text{mols}$ |        |        |         |         |         | Sum<br>( $\mu\text{mols}$ ) | Selectivity<br>(%) |
|----------------------------|----------------------------------|--------|--------|---------|---------|---------|-----------------------------|--------------------|
|                            | 30 min                           | 60 min | 90 min | 120 min | 150 min | 180 min |                             |                    |
| Ethers                     | 12729.7                          | 7179.5 | 4282.8 | 2280.8  | 4910.7  | 1416.6  | 32800.1                     | 32.9               |
| Alkenes                    | 8893.0                           | 6761.5 | 5758.5 | 2353.3  | 4032.2  | 564.3   | 28362.9                     | 28.4               |
| Aldehydes                  | 8109.8                           | 1423.2 | 1075.4 | 1245.4  | 2541.3  | 1815.0  | 16209.9                     | 16.3               |
| Cyclic (C6)                | 2683.6                           | 3869.0 | 2348.7 | 1090.7  | 2249.1  | 528.4   | 12769.5                     | 12.8               |
| Ketones                    | 3490.4                           | 1494.1 | 548.1  | 204.5   | 316.6   | 75.5    | 6129.2                      | 6.1                |
| Alcohols                   | 523.0                            | 143.2  | 98.7   | 84.9    | 299.9   | 148.4   | 1298.0                      | 1.3                |
| Cyclic (C5)                | 1283.4                           | 451.5  | 134.5  | 55.6    | 202.8   | 49.9    | 2177.7                      | 2.2                |

| 1-butanol consumption, Condensed and Gaseous Products |         |         |         |        |         |        | Yield (%) |      |  |
|-------------------------------------------------------|---------|---------|---------|--------|---------|--------|-----------|------|--|
| 1-butanol (total, $\mu\text{mols}$ )                  |         |         |         |        |         |        | 275388.0  |      |  |
| 1-butanol (not reacted, $\mu\text{mols}$ )            | 1884.6  | 482.5   | 458.4   | 826.9  | 3562.0  | 2821.7 | 7214.3    |      |  |
| 1-butanol consumption (%)                             | 95.9    | 98.9    | 99.0    | 98.2   | 92.2    | 93.9   | 96.4      |      |  |
| Condensed Products ( $\mu\text{mols}$ )               | 37712.9 | 21322.0 | 14246.6 | 7315.1 | 14552.6 | 4598.2 | 99747.3   | 37.1 |  |
| Gaseous Products ( $\mu\text{mols}$ )                 |         |         |         |        |         |        | 168427.0  | 62.9 |  |

\* 2,3-dimethyl-1,3-hexadiene, 3-hexanone, 3-methyl-4-heptanone, 2-ethylhexanal, 1-ethyl-2-methylbenzene, 1,2,3-trimethylbenzene, 2-ethyl-2-hexenal, 4-nonanone, 2,3-dimethyl-2-cyclopenten-1-one, 1-ethyl-3,5-dimethylbenzene, 1,3,5-triethylbenzene, 2,3,4-trimethyl-2-cyclopenten-1-one, 3,4-dimethyl-2-cyclohexen-1-one, 2,2,5,5-tetramethyl-3-cyclopenten-1-one, 3,5-dimethylphenol, 2-methylphenol.

## 5. References

- [1] F. Cavani, F. Trifiro, A. Vaccari, *Catalysis Today*, 1991, **11**, 173-301.
- [2] J. A. Barrett, Z. R. Jones, C. Stickelmaier, N. Schopp, P. C. Ford, *ACS Sustainable Chemistry & Engineering*, 2018, **6**, 15119-15126.
- [3] M. Chui, G. Metzker, C. M. Bernt, A. T. Tran, A. C. B. Burtoloso, P. C. Ford, *ACS Sustainable Chemistry & Engineering*, 2017, **5**, 3158-3169.
- [4] K. K. Ramasamy, M. Gray, H. Job, D. Santosa, X. S. Li, A. Devaraj, A. Karkamkar, Y. Wang, *Topics in Catalysis*, 2016, **59**, 46-54.
